# Supplementary material for: P2Y12 inhibitor monotherapy or dual antiplatelet therapy after coronary revascularisation: individual patient level meta-analysis of randomised controlled trials
Source: PubMed Central journal article supplement — BMJ. 2021 Jun 16;373:n1332. doi: 10.1136/bmj.n1332 (PMC8207247; doi:10.1136/bmj.n1332), 2021-06-16
Supplement: valm065670.ww1.pdf [file valm065670.ww1.pdf]

# P2Y12 inhibitor monotherapy or dual antiplatelet therapy after coronary revascularisation: an individual patient-level meta-analysis of randomised controlled trials

Valgimigli et al.

## Contents

|                                                                                                                                                                                                                                                                                |             |
|--------------------------------------------------------------------------------------------------------------------------------------------------------------------------------------------------------------------------------------------------------------------------------|-------------|
| <b>SIDNEY-2 COLLABORATORS .....</b>                                                                                                                                                                                                                                            | <b>3</b>    |
| <b>SUPPLEMENTARY METHODS.....</b>                                                                                                                                                                                                                                              | <b>4</b>    |
| <b>ASSEMBLED DATASET.....</b>                                                                                                                                                                                                                                                  | <b>4</b>    |
| <b>SEARCH STRATEGY .....</b>                                                                                                                                                                                                                                                   | <b>5</b>    |
| <b>REFERENCE LIST OF INCLUDED TRIALS.....</b>                                                                                                                                                                                                                                  | <b>7</b>    |
| <b>SECONDARY ENDPOINTS .....</b>                                                                                                                                                                                                                                               | <b>8</b>    |
| <b>FURTHER DETAILS ON DATA ANALYSIS .....</b>                                                                                                                                                                                                                                  | <b>8</b>    |
| <b>SUPPLEMENTARY TABLES .....</b>                                                                                                                                                                                                                                              | <b>10</b>   |
| <b>SUPPLEMENTARY TABLE A. MAIN CHARACTERISTICS OF RANDOMISED TRIALS INCLUDED IN THE POOLED ANALYSIS.....</b>                                                                                                                                                                   | <b>10</b>   |
| <b>SUPPLEMENTARY TABLE B. MAIN INCLUSION AND EXCLUSION CRITERIA IN POOLED RANDOMISED TRIALS .....</b>                                                                                                                                                                          | <b>10</b>   |
| <b>SUPPLEMENTARY TABLE C. DEFINITION OF CLINICAL ENDPOINTS IN RANDOMISED TRIALS INCLUDED IN THE IPD META-ANALYSIS.....</b>                                                                                                                                                     | <b>19</b>   |
| <b>SUPPLEMENTARY TABLE D. RISK OF BIAS IN THE INCLUDED TRIALS AS ASSESSED BY THE COCHRANE RISK OF BIAS ASSESSMENT TOOL.....</b>                                                                                                                                                | <b>27</b>   |
| <b>SUPPLEMENTARY TABLE E. BASELINE CHARACTERISTICS STRATIFIED BY TRIAL.....</b>                                                                                                                                                                                                | <b>28</b>   |
| <b>SUPPLEMENTARY TABLE F. PROCEDURAL CHARACTERISTICS .....</b>                                                                                                                                                                                                                 | <b>100</b>  |
| <b>SUPPLEMENTARY TABLE G. PROCEDURAL CHARACTERISTICS STRATIFIED BY TRIAL.....</b>                                                                                                                                                                                              | <b>322</b>  |
| <b>SUPPLEMENTARY TABLE H. ONE STEP MIXED-EFFECT COX REGRESSION MODEL FOR THE ITT POPULATION INCLUDING THE INITIAL DAPT PHASE AFTER RANDOMISATION IN GLASSY, SMART-CHOICE, STOPDAPT-2, AND TICO TRIALS.....</b>                                                                 | <b>344</b>  |
| <b>SUPPLEMENTARY TABLE I. ONE STEP MIXED-EFFECT COX REGRESSION MODEL FOR THE ITT POPULATION EXCLUDING PATIENTS WITH MI, ISCHAEMIC STROKE, OR TVR OCCURRING DURING THE INITIAL DAPT PHASE AFTER RANDOMISATION IN GLASSY, SMART-CHOICE, STOPDAPT-2, AND TICO TRIALS.....</b>     | <b>355</b>  |
| <b>SUPPLEMENTARY TABLE J. ONE STEP MIXED-EFFECT COX REGRESSION MODEL FOR THE ITT POPULATION EXCLUDING PATIENTS WITH MI OR ISCHAEMIC STROKE, OCCURRING DURING THE INITIAL DAPT PHASE AFTER RANDOMISATION IN GLASSY, SMART-CHOICE, STOPDAPT-2, AND TICO TRIALS.....</b>          | <b>366</b>  |
| <b>SUPPLEMENTARY TABLE K. ONE STEP MIXED-EFFECT COX REGRESSION MODEL FOR THE ITT POPULATION EXCLUDING PATIENTS WITH BARC TYPE 3 OR 5 OCCURRING DURING THE INITIAL DAPT PHASE AFTER RANDOMISATION IN GLASSY, SMART-CHOICE, STOPDAPT-2, AND TICO TRIALS.....</b>                 | <b>377</b>  |
| <b>SUPPLEMENTARY TABLE L. ONE STEP MIXED-EFFECT COX REGRESSION MODEL FOR THE ITT POPULATION EXCLUDING PATIENTS WITH BARC TYPE 2, 3 OR 5 OCCURRING DURING THE INITIAL DAPT PHASE AFTER RANDOMISATION IN GLASSY, SMART-CHOICE, STOPDAPT-2, AND TICO TRIALS.....</b>              | <b>38</b>   |
| <b>SUPPLEMENTARY TABLE M. ONE STEP MIXED-EFFECT COX REGRESSION MODEL FOR ITT POPULATION EXCLUDING PATIENTS WITH MI, STROKE, TVR, BARC TYPE 2, 3 OR 5 OCCURRING DURING THE INITIAL DAPT PHASE AFTER RANDOMISATION IN GLASSY, SMART-CHOICE, STOPDAPT-2, AND TICO TRIALS.....</b> | <b>3939</b> |
| <b>SUPPLEMENTARY TABLE N. ONE STEP MIXED-EFFECT COX REGRESSION MODEL IN THE ON-TREATMENT POPULATIONS .....</b>                                                                                                                                                                 | <b>400</b>  |
| <b>SUPPLEMENTARY TABLE O. ONE STEP MIXED-EFFECT COX REGRESSION MODEL FOR ITT POPULATION RIGHT CENSORING EVENTS 9 MONTHS AFTER THE START OF P2Y<sub>12</sub> INHIBITOR MONOTHERAPY IN THE EXPERIMENTAL GROUPS.....</b>                                                          | <b>422</b>  |
| <b>SUPPLEMENTARY FIGURES.....</b>                                                                                                                                                                                                                                              | <b>43</b>   |

|                                                                                                                                                                                                                                                                             |                                     |
|-----------------------------------------------------------------------------------------------------------------------------------------------------------------------------------------------------------------------------------------------------------------------------|-------------------------------------|
| <b>SUPPLEMENTARY FIGURE A. PRISMA FLOW DIAGRAM FOR THE SYSTEMATIC REVIEW. ....</b>                                                                                                                                                                                          | <b>ERROR! BOOKMARK NOT DEFINED.</b> |
| <b>SUPPLEMENTARY FIGURE B. SIDNEY-2 FLOW-CHART .....</b>                                                                                                                                                                                                                    | <b>444</b>                          |
| <b>SUPPLEMENTARY FIGURE C. SUBGROUP ANALYSES FOR THE PRIMARY ENDPOINT OF ALL-CAUSE DEATH, MYOCARDIAL INFARCTION, OR STROKE IN THE PER-PROTOCOL POPULATION.....</b>                                                                                                          | <b>466</b>                          |
| <b>SUPPLEMENTARY FIGURE D. SUBGROUP ANALYSES FOR THE PRIMARY ENDPOINT OF ALL-CAUSE DEATH, MYOCARDIAL INFARCTION, OR STROKE FOR MONOTHERAPY WITH A NEWER P2Y<sub>12</sub> INHIBITOR IN THE EXPERIMENTAL ARM IN THE INTENTION TO TREAT POPULATION .....</b>                   | <b>477</b>                          |
| <b>SUPPLEMENTARY FIGURE E. SUBGROUP ANALYSES FOR THE PRIMARY ENDPOINT OF ALL-CAUSE DEATH, MYOCARDIAL INFARCTION, OR STROKE FOR MONOTHERAPY WITH CLOPIDOGREL IN THE EXPERIMENTAL ARM IN THE INTENTION TO TREAT POPULATION.....</b>                                           | <b>48</b>                           |
| <b>SUPPLEMENTARY FIGURE F. SUBGROUP ANALYSES FOR THE KEY SAFETY ENDPOINT OF BLEEDING ACADEMIC RESEARCH CONSORTIUM (BARC) TYPE 3 OR 5 BLEEDING IN THE INTENTION TO TREAT POPULATION.....</b>                                                                                 | <b>4949</b>                         |
| <b>SUPPLEMENTARY FIGURE G. SUBGROUP ANALYSES FOR THE KEY SAFETY ENDPOINT OF BLEEDING ACADEMIC RESEARCH CONSORTIUM (BARC) TYPE 3 OR 5 BLEEDING FOR MONOTHERAPY WITH A NEWER P2Y<sub>12</sub> INHIBITOR IN THE EXPERIMENTAL ARM IN THE INTENTION TO TREAT POPULATION.....</b> | <b>500</b>                          |
| <b>SUPPLEMENTARY FIGURE H. SUBGROUP ANALYSES FOR THE KEY SAFETY ENDPOINT OF BLEEDING ACADEMIC RESEARCH CONSORTIUM (BARC) TYPE 3 OR 5 BLEEDING FOR MONOTHERAPY WITH CLOPIDOGREL IN THE EXPERIMENTAL ARM IN THE INTENTION TO TREAT POPULATION .....</b>                       | <b>511</b>                          |
| <b>SUPPLEMENTARY FIGURE I. TREATMENT-BY-WEIGHT INTERACTION FOR THE PRIMARY EFFICACY ENDPOINT OF ALL-CAUSE DEATH, CARDIOVASCULAR DEATH, MYOCARDIAL INFARCTION, OR STROKE STRATIFIED BY SEX IN THE INTENTION TO TREAT POPULATION .....</b>                                    | <b>522</b>                          |
| <b>SUPPLEMENTARY FIGURE J. TREATMENT-BY-SEX INTERACTION TESTING FOR THE PRIMARY OUTCOME FOR EACH TRIAL .....</b>                                                                                                                                                            | <b>533</b>                          |
| <b>SUPPLEMENTARY REFERENCES.....</b>                                                                                                                                                                                                                                        | <b>54</b>                           |

## **SIDNEY-2 Collaborators**

**Study Principal Investigators:** Marco Valgimigli, MD, PhD and Roxana Mehran, MD

**Steering Committee Members:** Stephan Windecker, MD, Pascal Vranckx, MD, PhD, Felice Gagnano, MD, Anna Franzone, MD, PhD, Yangsoo Jang, MD, PhD, Takeshi Kimura, MD, Joo-Yong Hahn, MD, Qiang Zhao, MD, PhD, Hirotoshi Watanabe, MD, Young Bin Song, MD, Yunpeng Zhu, MD, Usman Baber, MD, Dominick J. Angiolillo, MD, PhD, Shamir Mehta, MD, Michael C. Gibson, MD.

**Statistical Committee Members:** Peter Jüni, MD (Chair), Mattia Branca, PhD, Bruno R. da Costa, PhD, Samantha Sartori, PhD, Dierik Heg, PhD.

## Supplementary Methods

### Assembled Dataset

IPD were provided for the following variables: physical assessment (gender, age, height, weight, country of randomisation), medical history (diabetes, insulin-treated diabetes, cigarette smoking, hypercholesterolaemia, hypertension, liver disease, peripheral artery disease, previous myocardial infarction, previous percutaneous coronary intervention, previous coronary artery bypass grafting, prior stroke, prior bleeding, history of chronic kidney disease, chronic lung disease), medication on admission (antiplatelet medication on admission), laboratory prior to index percutaneous coronary intervention (creatinine, haemoglobin, white cell count, troponin elevation, CK elevation, CK-MB elevation), procedure information (arterial access, indication for percutaneous coronary intervention), procedural medication (aspirin loading dose, P2Y<sub>12</sub> loading dose, unfractionated heparin, low molecular weight heparin, glycoprotein IIb/IIIa inhibitors, bivalirudin), angiographic features (left ventricular ejection fraction), intervention (number of vessels treated, number of lesions treated, number of single lesions treated with total stent length >30 mm, post-PCI diameter stenosis, treated vessel [left anterior descending artery, left circumflex artery, right coronary artery, left main], lesion morphology of any target lesions [bifurcation, thrombus, venous or arterial grafts, total occlusion], bifurcation target lesion treated with at least 2 stents, TIMI pre percutaneous coronary intervention, number of implanted stents, diameter of each implanted stent, length of each implanted stent, overlapping stents, total stent length, stent type, minimum diameter of all stents implanted, maximum diameter of all stents implanted, thrombus aspiration), intervention for post-coronary artery bypass grafting patients (number of arterial graft(s), number of venous graft(s), on-pump coronary artery bypass grafting), hospital stay, medication at discharge (aspirin, P2Y<sub>12</sub> inhibitors, ACE-inhibitors or ATII antagonists, beta-blockers, statins, proton pump inhibitors), duration of participation in the study, reason for end, vital status (dead or alive), date of death, adverse events (bleeding [BARC, TIMI], death [cardiovascular, non-cardiovascular], myocardial infarction [type of myocardial infarction, relation to target vessel], stent thrombosis [timing, possible, probable, definite], stroke [ischaemic, haemorrhagic, not otherwise specified], recurrent adverse events, study medication initiation (ie, at least one dose received), study medication cessation (medication stopped, date of cessation), complete or incomplete fulfillment of enrolment criteria.

### Search Strategy

| Ovid MEDLINE(R) and Epub Ahead of Print, In-Process & Other Non-Indexed |                                                            |         | EMBASE |                                                                         |         |
|-------------------------------------------------------------------------|------------------------------------------------------------|---------|--------|-------------------------------------------------------------------------|---------|
| No.                                                                     | Query                                                      | Results | No.    | Query                                                                   | Results |
| #1                                                                      | coronary artery disease.ab,ti.                             | 85454   | #1     | 'coronary artery disease*':ab,ti<br>AND [embase]/lim                    | 124775  |
| #2                                                                      | myocardial infarction.ab,ti.                               | 182906  | #2     | 'myocardial infarc*':ab,ti AND [embase]/lim                             | 249971  |
| #3                                                                      | "acute coronar* syndrom*".ab,ti.                           | 32116   | #3     | 'acute coronary syndrome*':ab,ti<br>AND [embase]/lim                    | 52441   |
| #4                                                                      | percutaneous coronary intervention.ab,ti.                  | 31832   | #4     | 'percutaneous coronary intervention*':ab,ti<br>AND [embase]/lim         | 56360   |
| #5                                                                      | "coronary bypass graft*".ab,ti.                            | 2614    | #5     | 'coronary artery bypass':ti,ab<br>AND [embase]/lim                      | 48135   |
| #6                                                                      | *Coronary Artery Disease/co, dt, mo, su, th                | 19940   | #6     | #1 OR #2 OR #3 OR #4 OR #5                                              | 420418  |
| #7                                                                      | *Myocardial Infarction/co, dt, mo, su, th                  | 51783   | #7     | 'clopidogrel':ti,ab AND [embase]/lim                                    | 22791   |
| #8                                                                      | *Acute Coronary Syndrome/co, dt, mo, su, th                | 6710    | #8     | 'plavix':ti,ab AND [embase]/lim                                         | 768     |
| #9                                                                      | *Percutaneous Coronary Intervention/ae, co, dt, mo, su, th | 2545    | #9     | #7 OR #8                                                                | 23210   |
| #10                                                                     | *Coronary Artery Bypass/ae, mo, th                         | 6737    | #10    | 'prasugrel':ti,ab AND [embase]/lim                                      | 4066    |
| #11                                                                     | 1 or 2 or 3 or 4 or 5 or 6 or 7 or 8 or 9 or 10            | 306487  | #11    | (effient:ti,ab OR efient:ti,ab)<br>AND [embase]/lim                     | 57      |
| #12                                                                     | clopidogrel.ti,ab.                                         | 12753   | #12    | ('cs 747':ti,ab OR ly640315:ti,ab<br>OR hsd7995:ti,ab) AND [embase]/lim | 31      |
| #13                                                                     | *clopidogrel/                                              | 600     | #13    | #10 OR #11 OR #12                                                       | 4080    |
| #14                                                                     | Plavix.mp.                                                 | 319     | #14    | 'ticagrelor':ti,ab AND [embase]/lim                                     | 4917    |
| #15                                                                     | 12 or 13 or 14                                             | 12913   | #15    | (brilinta:ti,ab OR brilique:ti,ab OR possia:ti,ab)<br>AND [embase]/lim  | 76      |

|     |                                                 |       |     |                                                                            |       |
|-----|-------------------------------------------------|-------|-----|----------------------------------------------------------------------------|-------|
| #16 | prasugrel.ti,ab.                                | 2209  | #16 | (azd6140:ti,ab OR 'ar c126532xx':ti,ab OR hsdb8306:ti,ab) AND [embase]/lim | 88    |
| #17 | *prasugrel/                                     | 438   | #17 | #14 OR #15 OR #16                                                          | 4990  |
| #18 | (Effient or Efient).mp.                         | 36    | #18 | 'p2y12':ti,ab AND [embase]/lim                                             | 4712  |
| #19 | (CS-747 or LY640315 or HSDB7995).mp.            | 30    | #19 | #9 OR #13 OR #17 OR #18                                                    | 27036 |
| #20 | 16 or 17 or 18 or 19                            | 2248  | #20 | #6 AND #19                                                                 | 13905 |
| #21 | ticagrelor.ti,ab.                               | 2714  |     |                                                                            |       |
| #22 | *ticagrelor/                                    | 413   |     |                                                                            |       |
| #23 | (Brilinta or Brilique or Possia).mp             | 38    |     |                                                                            |       |
| #24 | (AZD6140 or AR-C126532XX or HSDB8306).mp.       | 63    |     |                                                                            |       |
| #25 | 21 or 22 or 23 or 24                            | 2782  |     |                                                                            |       |
| #26 | P2Y12.ti,ab.                                    | 3758  |     |                                                                            |       |
| #27 | *Purinergic P2Y Receptor Antagonists/ae, tu, to | 716   |     |                                                                            |       |
| #28 | 26 or 27 (4090)                                 | 4090  |     |                                                                            |       |
| #29 | 15 or 20 or 25 or 28                            | 15936 |     |                                                                            |       |
| #30 | 11 and 29                                       | 8163  |     |                                                                            |       |

### Reference list of included trials

1. Zhao Q, Zhu Y, Xu Z, et al. Effect of Ticagrelor Plus Aspirin, Ticagrelor Alone, or Aspirin Alone on Saphenous Vein Graft Patency 1 Year After Coronary Artery Bypass Grafting. *JAMA* 2018;319:1677–86.
2. Franzone A, McFadden E, Leonardi S, et al. Ticagrelor Alone Versus Dual Antiplatelet Therapy From 1 Month After Drug-Eluting Coronary Stenting. *J Am Coll Cardiol* 2019;74:2223–34.
3. Hahn JY, Song Y Bin, Oh JH, et al. Effect of P2Y12 Inhibitor Monotherapy vs Dual Antiplatelet Therapy on Cardiovascular Events in Patients Undergoing Percutaneous Coronary Intervention. *JAMA* 2019;321:2428–37.
4. Watanabe H, Domei T, Morimoto T, et al. Effect of 1-Month Dual Antiplatelet Therapy Followed by Clopidogrel vs 12-Month Dual Antiplatelet Therapy on Cardiovascular and Bleeding Events in Patients Receiving PCI. *JAMA* 2019;321:2414–27.
5. Kim BK, Hong SJ, Cho YH, et al. Effect of Ticagrelor Monotherapy vs Ticagrelor With Aspirin on Major Bleeding and Cardiovascular Events in Patients With Acute Coronary Syndrome: The TICO Randomized Clinical Trial. *JAMA* 2020;323:2407–16.
6. Mehran R, Baber U, Sharma SK, et al. Ticagrelor with or without Aspirin in High-Risk Patients after PCI. *N Engl J Med* 2019;381:2032–42.

## **Secondary endpoints**

Secondary endpoints included each component of the primary efficacy endpoint, cardiovascular and non-cardiovascular mortality, ischaemic and/or haemorrhagic stroke, definite and/or probable stent thrombosis, bleeding according to BARC (Bleeding Academic Research Consortium) or TIMI (Thrombolysis in Myocardial Infarction) scales, and net adverse events consisting of the composite of the primary efficacy and key safety endpoints.

## **Further details on data analysis**

Baseline and procedural continuous variables were summarised by means and standard deviations or medians and interquartile range, categorical variables by counts and percentages. The randomised groups were compared using Chi-squared or Fisher's exact test for binary and categorical variables and t-test or Wilcoxon test for continuous variables as appropriate.

Sensitivity analyses for superiority were performed in the per-protocol populations of the trials mandating an initial DAPT phase after randomisation in both experimental and control groups,<sup>1-6</sup> patients were left-truncated at the time-point when the protocol specified the change from DAPT to P2Y<sub>12</sub> inhibitor monotherapy in the experimental group. Data was analysed up to the longest available time-point with protocol-specified P2Y<sub>12</sub> inhibitor monotherapy in the experimental group and DAPT in the control group.<sup>1-6</sup> Since overall mortality does not require adjudication, a sensitivity analysis restricted to overall mortality was performed including the GLOBAL LEADERS (GLOBAL LEADERS: A Clinical Study Comparing Two Forms of Anti-platelet Therapy After Stent Implantation; NCT01813435)<sup>7</sup> dataset instead of GLASSY (GLOBAL LEADERS Adjudication Sub-Study; NCT03231059).<sup>2</sup> Results for outcomes with time-to-event data were displayed as non-stratified Kaplan-Meier curves for descriptive purposes. Sensitivity analyses were performed considering the same mixed-effect Cox regression approach (i) including the initial DAPT phase in trials with an initial DAPT phase after randomisation in both experimental and control groups, (ii) excluding patients who experienced non-fatal events during the initial DAPT phase, (iii)



including the study period in whom all the trials had available information. The proportional hazard assumption has been verified for each single trial separately and the corresponding p-values have been meta-analysed obtaining a negative overall p-value ( $p=0.093$ ).

An on-treatment sensitivity analysis was explored for all study outcomes, where patients were truncated at the point they interrupted the study treatment for more than 5 days. For descriptive purposes, we plotted Kaplan-Meier time-to-event curves for the primary ischaemic and key bleeding secondary endpoints; since all trials had a 1:1 randomisation ratio, the curves were not subject to Simpson's paradox.<sup>8</sup> Numbers-needed-to-treat to benefit (NNTBs) were derived from the annualised control group event rate estimated from Poisson regression and the pooled HR.<sup>9</sup> The per-protocol population was pre-specified and excluded ineligible patients (ie, violating inclusion/exclusion criteria) and/or those who never received allocated treatment strategy. As post-hoc analysis, sex was further analysed with respect to each component of the primary efficacy endpoint and in each trial separately and stratified into categories according to the weight. Pre-specified subgroup analyses of the primary endpoints were based on the same one-step approach mixed-effect Cox regression. In this case, the within-trial and across-trial interactions were separated and based tests for subgroup-by-treatment interactions on within-trial interactions. Analyses were done in Stata Release 16.1 (StataCorp LP, College Station, Texas) and R version 3.6.1 (R Foundation, Vienna, Austria).

### Supplementary tables

**Supplementary table A.** Main characteristics of randomised trials included in the pooled analysis

| Trial         | N    | Follow-up (yrs) | Timing of randomisation | Experimental arm                                                                                                                       | Control arm                                                                                                                                                                                | Primary endpoint                                                                                                                                              | Blinded adjudication of events | Industry funded |
|---------------|------|-----------------|-------------------------|----------------------------------------------------------------------------------------------------------------------------------------|--------------------------------------------------------------------------------------------------------------------------------------------------------------------------------------------|---------------------------------------------------------------------------------------------------------------------------------------------------------------|--------------------------------|-----------------|
| <b>DACAB</b>  | 334  | 1               | At index CABG           | 12-month ticagrelor 90mg twice daily monotherapy                                                                                       | 12-month DAPT (ticagrelor 90mg twice daily plus aspirin 100mg once daily)                                                                                                                  | <i>Saphenous vein graft patency 1 year after CABG (FitzGibbon grade A)</i>                                                                                    | Yes                            | No              |
| <b>GLASSY</b> | 7585 | 2               | At index PCI            | 1-month DAPT (75 to 100mg of aspirin plus 90mg of ticagrelor twice daily) followed by 23-month ticagrelor 90mg twice daily monotherapy | 12-month DAPT (75 to 100mg of aspirin plus 75mg of clopidogrel in patients with stable CAD or 90mg of ticagrelor twice daily in patients with ACS) followed by aspirin alone for 12 months | <i>Coprimary efficacy endpoint, composite of death, MI, stroke or urgent TVR<br/>Coprimary safety endpoint, composite of BARC type 3 or 5 bleeding events</i> | Yes                            | No              |

|                     |      |   |              |                                                                                                                                             |                                                                                |                                                                                                                                |     |    |
|---------------------|------|---|--------------|---------------------------------------------------------------------------------------------------------------------------------------------|--------------------------------------------------------------------------------|--------------------------------------------------------------------------------------------------------------------------------|-----|----|
| <b>SMART-CHOICE</b> | 2993 | 1 | At index PCI | 100-325mg/d aspirin plus a P2Y <sub>12</sub> inhibitor for 3 months and thereafter P2Y <sub>12</sub> inhibitor alone until 1 year           | DAPT with 100-325mg/d aspirin plus a P2Y <sub>12</sub> inhibitor for 12 months | All-cause death, MI, or stroke at 12 months                                                                                    | Yes | No |
| <b>STOPDAPT-2</b>   | 3009 | 1 | At index PCI | 1-month DAPT with 81-200mg/d aspirin and 75 mg/d clopidogrel or 3,75mg/d prasugrel, followed by 75mg/d clopidogrel monotherapy until 1 year | 12 months of DAPT with 81-200mg/d aspirin and 75mg/d clopidogrel               | Cardiovascular death, MI, ischaemic or haemorrhagic stroke, definite stent thrombosis, or major or minor bleeding at 12 months | Yes | No |
| <b>TICO</b>         | 3056 | 1 | At index PCI | 100mg/d aspirin plus ticagrelor 90mg twice daily for 3 months and thereafter ticagrelor monotherapy                                         | 12 months of DAPT with 100mg/d aspirin and ticagrelor 90mg twice daily         | All-cause death, MI, stent thrombosis, stroke, or TVR                                                                          | Yes | No |

---

|                 |      |   |                       |                                                        |                                                                          |                                                                                    |     |    |
|-----------------|------|---|-----------------------|--------------------------------------------------------|--------------------------------------------------------------------------|------------------------------------------------------------------------------------|-----|----|
| <b>TWILIGHT</b> | 6532 | 1 | At 3 months after PCI | Ticagrelor 90mg twice daily plus placebo for 12 months | Ticagrelor 90mg twice daily plus aspirin 81 to 100mg daily for 12 months | First occurrence of BARC type 2, 3, or 5 bleeding between randomisation and 1 year | Yes | No |
|-----------------|------|---|-----------------------|--------------------------------------------------------|--------------------------------------------------------------------------|------------------------------------------------------------------------------------|-----|----|

---

BARC=Bleeding Academy Research Consortium; CABG=coronary artery bypass surgery; CAD=coronary artery disease; DACAB=Different Antiplatelet Therapy Strategy After Coronary Artery Bypass Graft Surgery; DAPT=dual antiplatelet therapy; GLASSY=GLOBAL LEADERS Adjudication Sub-Study; MI=myocardial infarction; PCI=percutaneous coronary intervention; SMART-CHOICE=Smart Angioplasty Research Team: Comparison Between P2Y12 Antagonist Monotherapy vs Dual Antiplatelet Therapy in Patients Undergoing Implantation of Coronary Drug-Eluting Stents; STOPDAPT-2=Short and Optimal Duration of Dual Antiplatelet Therapy After Everolimus-Eluting Cobalt-Chromium Stent; TICO=Ticagrelor Monotherapy After 3 Months in the Patients Treated With New Generation Sirolimus-eluting Stent for Acute Coronary Syndrome; TVR=target vessel revascularisation; TWILIGHT=Ticagrelor with Aspirin or Alone in High-Risk Patients after Coronary Intervention.

**Supplementary table B.** Main inclusion and exclusion criteria in pooled randomised trials

| Study               | Major inclusion criteria                                                                                                        | Major exclusion criteria                                                                                                                                                                                                                                                                                                                                                                                                                                                                                                                                                                                                                                                                                                                                                                                                                                                                                                                                                                                                                                                                                                                                                                                                                                                                                                                                                                                                                                                                                                                                                                                                                                                                                                               |
|---------------------|---------------------------------------------------------------------------------------------------------------------------------|----------------------------------------------------------------------------------------------------------------------------------------------------------------------------------------------------------------------------------------------------------------------------------------------------------------------------------------------------------------------------------------------------------------------------------------------------------------------------------------------------------------------------------------------------------------------------------------------------------------------------------------------------------------------------------------------------------------------------------------------------------------------------------------------------------------------------------------------------------------------------------------------------------------------------------------------------------------------------------------------------------------------------------------------------------------------------------------------------------------------------------------------------------------------------------------------------------------------------------------------------------------------------------------------------------------------------------------------------------------------------------------------------------------------------------------------------------------------------------------------------------------------------------------------------------------------------------------------------------------------------------------------------------------------------------------------------------------------------------------|
| <p><b>DACAB</b></p> | <ul style="list-style-type: none"> <li>• Age ≥18 and up to 80 years</li> <li>• Indications for elective CABG surgery</li> </ul> | <ul style="list-style-type: none"> <li>• Cardiogenic shock, haemodynamic instability</li> <li>• Need for urgent revascularisation within 5 days from presentation</li> <li>• Single vessel disease</li> <li>• Two vessel disease with normal left ventricular function (&gt;50%)</li> <li>• Need for concomitant other cardiac surgery (ie, valve replacement)</li> <li>• Need for dual antiplatelet treatment for the patients undergoing CABG after acute coronary syndrome</li> <li>• Contraindication for aspirin and ticagrelor use (ie, known allergy)</li> <li>• History of bleeding diathesis within 3 months prior to presentation</li> <li>• History of significant gastrointestinal bleed within 1 year prior to presentation</li> <li>• History of peptic ulcer without gastrointestinal bleeding in the past 3 years</li> <li>• History of intracranial haemorrhage</li> <li>• History of moderate to severe liver impairment</li> <li>• Patient requiring dialysis</li> <li>• Patient with an increased risk of bradycardia (ie, patients without a pacemaker who have sick sinus syndrome, 2nd or 3rd degree AV block or bradycardia-related syncope)</li> <li>• Need vitamin K antagonist therapy after CABG (ie, persistent atrial fibrillation, mechanical heart valves)</li> <li>• Known, clinically important thrombocytopenia (ie, &lt;100 x 10<sup>9</sup>/L)</li> <li>• Known, clinically important anemia (ie, &lt;100 g/L)</li> <li>• Participation in another investigational drug or device study in the last 30 days</li> <li>• Pregnant or lactating female patients<br/>Premenopausal women are required to use 2 methods of reliable contraception, one of which must include barrier method</li> </ul> |

---

**GLASSY**

- Concomitant oral or intravenous therapy with strong CYP3A4 inhibitors, CYP3A4 substrates with narrow therapeutic indices, or strong CYP3A4 inducers which cannot be stopped for the course of the study (strong inhibitors include ketoconazole, itraconazole, voriconazole, telithromycin, clarithromycin, nefazadone, ritonavir, saquinavir, nelfinavir, indinavir, atazanavir, and >1 liter/day of grapefruit juice. Substrates with a narrow therapeutic index include cyclosporine, and quinidine. Strong inducers include rifampin, phenytoin, and carbamazepine)
  - Active cancer
  - Life expectancy <12 months
  - Indication for major surgery (ie, cancer treatment, carotid surgery, cerebral surgery, major vascular surgery)
- 
- Age ≥18 years
  - Patients with any clinical indication for PCI
  - Presence of one or more coronary artery stenosis of 50% or more in a native coronary artery or in a saphenous venous or arterial bypass conduit suitable for coronary stent implantation in a vessel with a reference vessel diameter of at least 2.25 millimeter
- Known intolerance to aspirin, P2Y<sub>12</sub> receptor antagonists, bivalirudin, stainless steel or biolimus
  - Known intake of a strong cytochrome P3A4 inhibitor
  - Use of fibrinolytic therapy within 24 hours of PCI
  - Known severe hepatic impairment
  - Planned CABG as a staged procedure (hybrid) within 12 months of the index procedure
  - Planned surgery within 12 months of PCI unless DAPT is maintained throughout the peri-surgical period
  - Need for oral anticoagulation therapy
  - PCI for a priori known stent thrombosis
  - Known overt major bleeding
  - Known history of intracranial haemorrhage
  - Known stroke from ischaemic or unknown cause within last 30 days
  - Known pregnancy at time of randomisation
  - Inability to provide informed consent
  - Currently participating in another trial before reaching primary endpoint
-

---

**SMART-CHOICE**

- Patients must be at least 20 years of age
- Patients are able to verbally confirm understandings of risks, benefits and treatment alternatives of receiving PCI and he/she or his/her legally authorised representative provides written informed consent prior to any study-related procedure
- Patients should have undergone successful PCI with drug-eluting stent for stable ischaemic heart disease or acute coronary syndrome
- Patients must have one or more coronary stenosis of 50% or more in a native coronary artery with a visually estimated diameter of  $\geq 2.25$  mm and  $\leq 4.25$  mm eligible for stent implantation
- Target lesion(s) must be amenable for PCI
- Patients with known hypersensitivity or contraindication to any of the following medications: aspirin, clopidogrel, prasugrel, ticagrelor, everolimus, or sirolimus
- Haemodynamic instability or cardiogenic shock
- Patients with active pathologic bleeding, including gastrointestinal or genitourinary bleeding
- Drug-eluting stent implantation within 12 months before index procedure
- Female of childbearing potential, unless a recent pregnancy test is negative, who possibly plan to become pregnant any time after enrolment into this study
- Non-cardiac co-morbid conditions are present with life expectancy  $< 2$  years or that may result in protocol non-compliance (per site investigator's medical judgment)
- Patients who are actively participating in another drug or device investigational study which have not completed the primary endpoint follow-up period

---

**STOPDAPT-2**

- Patients who have undergone PCI with the everolimus-eluting cobalt-chromium stent (CoCr-EES, Xience<sup>TM</sup>) and have not experienced major complications (death, myocardial infarction, stroke, or major
  - Patients requiring oral anticoagulants
  - Patients with medical history of intracranial haemorrhage
  - Patients who have experienced serious complications (myocardial infarction, stroke, major bleeding) during hospital stay post-PCI)
  - Patients with drug-eluting stent other than Xience implanted in PCI performed at the time of enrolment
  - Patients confirmed to have no tolerability to clopidogrel before enrolment
-

|                        |                                                                                                                                                                                                                                                                         |                                                                                                                                                                                                                                                                                                                                                                                                                                                                                                                                                                                                                                                                                                                                                                                                                                                                                                                                                                                                                                             |
|------------------------|-------------------------------------------------------------------------------------------------------------------------------------------------------------------------------------------------------------------------------------------------------------------------|---------------------------------------------------------------------------------------------------------------------------------------------------------------------------------------------------------------------------------------------------------------------------------------------------------------------------------------------------------------------------------------------------------------------------------------------------------------------------------------------------------------------------------------------------------------------------------------------------------------------------------------------------------------------------------------------------------------------------------------------------------------------------------------------------------------------------------------------------------------------------------------------------------------------------------------------------------------------------------------------------------------------------------------------|
|                        | <p>bleeding) during hospital stay for treatment</p> <ul style="list-style-type: none"> <li>• Patients who are capable of oral DAPT consisting of aspirin and a P2Y<sub>12</sub> receptor antagonist</li> </ul>                                                          | <ul style="list-style-type: none"> <li>• Patients requiring continuous administration of antiplatelet drugs (PDE3 inhibitors, prostaglandin preparations, etc.) other than aspirin and P2Y<sub>12</sub> receptor inhibitors (prasugrel, clopidogrel, and ticlopidine) at the time of enrolment</li> </ul>                                                                                                                                                                                                                                                                                                                                                                                                                                                                                                                                                                                                                                                                                                                                   |
| <p><b>TICO</b></p>     | <ul style="list-style-type: none"> <li>• Age ≥19 years</li> <li>• Patients who received bioresorbable polymer sirolimus-eluting stent implantation to treat acute coronary syndrome</li> <li>• Provision of informed consent</li> </ul>                                 | <ul style="list-style-type: none"> <li>• Age &gt;80 years</li> <li>• Increased risk of bleeding due to: 1) Any prior event of haemorrhagic stroke; 2) Ischaemic stroke, dementia, or impairment of central nervous system within a year; 3) Traumatic brain injury or brain surgery within the past 6 months; 4) Known intracranial tumor; 5) Documented or suspected aortic dissection; 6) Internal bleeding within the past 6 weeks; 7) Active bleeding or bleeding diathesis; 8) Anemia (haemoglobin ≤8 g/dL) or thrombocytopenia (platelet count &lt;100000/μL); 9) Major surgery or traumatic injury resulting in any impairment of physical activity within the past 3 weeks</li> <li>• Need for oral anticoagulation therapy</li> <li>• Current or potential pregnancy</li> <li>• Life expectancy &lt;1 year</li> <li>• Currently treated with strong cytochrome P4503A4 inhibitors</li> <li>• Moderate to severe hepatic dysfunction (Child-Pugh class B or C)</li> <li>• Increased risk of bradycardia-related symptoms</li> </ul> |
| <p><b>TWILIGHT</b></p> | <ul style="list-style-type: none"> <li>• High-risk patients who have undergone successful elective or urgent PCI with at least one locally approved drug-eluting stent discharged on DAPT with aspirin and ticagrelor of at least 3 months plus one clinical</li> </ul> | <ul style="list-style-type: none"> <li>• Under 18 years of age</li> <li>• Contraindication to aspirin</li> <li>• Contraindication to ticagrelor</li> <li>• Planned surgery within 90 days</li> <li>• Planned coronary revascularisation (surgical or percutaneous) within 90 days</li> <li>• Need for chronic oral anticoagulation</li> <li>• Prior stroke</li> <li>• Dialysis-dependent renal failure</li> <li>• Active bleeding or extreme-risk for major bleeding</li> </ul>                                                                                                                                                                                                                                                                                                                                                                                                                                                                                                                                                             |



---

and one angiographic inclusion criteria

*Clinical Criteria*

- ≥65 years of age
- Recent (≥3 days) presentation with acute coronary syndrome with clinical stabilisation and decreasing cardiac enzymes
- Established vascular disease defined as previous myocardial infarction, documented PAD, or CAD/PAD revascularisation
- Diabetes mellitus treated with medications
- Chronic kidney disease defined as an estimated glomerular filtration rate <60 ml/min/1.73m<sup>2</sup> or creatinine clearance <60 ml/min

*Angiographic Criteria*

- Multivessel coronary artery disease
- Target lesion requiring total stent length >30 mm
- SYNTAX score ≥23
- Bifurcation lesions with Medina X,X,1 classification requiring at least 2 stents
- Left main (≥50%) or proximal LAD (≥70%) lesion
- Calcified target lesion requiring atherectomy

- Emergent or salvage PCI or ST-segment elevation myocardial infarction presentation
- Liver cirrhosis
- Life expectancy <1 year
- Unable or unwilling to provide informed consent
- Women of childbearing potential (as determined by hospital standard of care)
- Fibrinolytic therapy within 24 hours of index PCI
- Concomitant therapy with a strong cytochrome P-450 3A inhibitor or inducer
- Platelet count <100000 mm<sup>3</sup>
- Requiring ongoing treatment with aspirin >325 mg daily

---

CABG=coronary artery bypass grafting; CAD=coronary artery disease; DAPT=dual antiplatelet therapy; DACAB=Different Antiplatelet Therapy Strategy After Coronary Artery Bypass Graft Surgery; GLASSY=GLOBAL LEADERS Adjudication Sub-Study; LAD=left anterior descending artery; PAD=peripheral artery disease; PCI=percutaneous Coronary Intervention; SMART-

CHOICE=Smart Angioplasty Research Team: Comparison Between P2Y12 Antagonist Monotherapy vs Dual Antiplatelet Therapy in Patients Undergoing Implantation of Coronary Drug-Eluting Stents; STOPDAPT-2=Short and Optimal Duration of Dual Antiplatelet Therapy After Everolimus-Eluting Cobalt-Chromium Stent; TICO=Ticagrelor Monotherapy After 3 Months in the Patients Treated With New Generation Sirolimus-eluting Stent for Acute Coronary Syndrome; TWILIGHT=Ticagrelor with Aspirin or Alone in High-Risk Patients after Coronary Intervention.

**Supplementary table C.** Definition of clinical endpoints in randomised trials included in the IPD meta-analysis

| Endpoint                    | DACAB                                                                                                                                                                                                                           | GLASSY                                                                                                                                                                                                                          | SMART-CHOICE                                                                                                                                                                                                               | STOPDAPT-2                                                                                                                                                                                                                                                                                                                                                                                                                                                              | TICO                                                                                                                                                                                                                                                                                                                                      | TWILIGHT                                                                                                                                                                                                                                                   |
|-----------------------------|---------------------------------------------------------------------------------------------------------------------------------------------------------------------------------------------------------------------------------|---------------------------------------------------------------------------------------------------------------------------------------------------------------------------------------------------------------------------------|----------------------------------------------------------------------------------------------------------------------------------------------------------------------------------------------------------------------------|-------------------------------------------------------------------------------------------------------------------------------------------------------------------------------------------------------------------------------------------------------------------------------------------------------------------------------------------------------------------------------------------------------------------------------------------------------------------------|-------------------------------------------------------------------------------------------------------------------------------------------------------------------------------------------------------------------------------------------------------------------------------------------------------------------------------------------|------------------------------------------------------------------------------------------------------------------------------------------------------------------------------------------------------------------------------------------------------------|
| <b>Cardiovascular death</b> | Death due to a cardiovascular aetiology such as acute MI, sudden cardiac death, heart failure, stroke, cardiovascular procedure, cardiovascular haemorrhage, and other cardiovascular causes such as pulmonary embolism or PAD. | Death due to a cardiovascular aetiology such as acute MI, sudden cardiac death, heart failure, stroke, cardiovascular procedure, cardiovascular haemorrhage, and other cardiovascular causes such as pulmonary embolism or PAD. |                                                                                                                                                                                                                            |                                                                                                                                                                                                                                                                                                                                                                                                                                                                         |                                                                                                                                                                                                                                                                                                                                           |                                                                                                                                                                                                                                                            |
| <b>Cardiac death</b>        |                                                                                                                                                                                                                                 |                                                                                                                                                                                                                                 | Any death due to proximate cardiac cause (ie, MI, low-output failure, fatal arrhythmia), unwitnessed death and death of unknown cause, and all procedure-related deaths, including those related to concomitant treatment. | Any death due to proximate cardiac cause (ie MI, low output failure, fatal arrhythmia), unwitnessed death and death of unknown cause, all procedure related deaths including those related to concomitant treatment. All deaths are considered cardiac unless an unequivocal non-cardiac cause can be established. Any unexpected death even in subjects with coexisting potentially fatal non-cardiac disease (ie, cancer, infection) should be classified as cardiac. | Cardiac death was defined as death due to MI, cardiac perforation or pericardial tamponade; arrhythmia or conduction abnormality stroke within 30 days of the procedure or related to the procedure; death due to a procedural complication; or any case of death in which a cardiac cause was not excluded by a clinical event committee | Any death due to proximate cardiac cause (ie, MI, low-output failure, fatal arrhythmia), unwitnessed death and death of unknown cause, all procedure-related deaths including those related to concomitant treatment, will be classified as cardiac death. |

**Vascular death**

Death caused by non-coronary vascular causes, such as cerebrovascular disease, pulmonary embolism, ruptured aortic aneurysm, dissecting aneurysm, or other vascular diseases.

Death due to non-coronary vascular causes such as cerebrovascular disease, pulmonary embolism, ruptured aortic aneurysm, dissecting aneurysm, or other vascular cause.

Death caused by non-coronary vascular causes, such as cerebrovascular disease, pulmonary embolism, ruptured aortic aneurysm, dissecting aneurysm or other causes.

**Noncardiovascular death**

Any death that is not thought to be due to a cardiovascular cause.

Any death that is not thought to be due to a cardiovascular cause. The following categories were collected: non-malignant causes, pulmonary, renal, gastrointestinal, hepatobiliary, pancreatic, infection (includes sepsis), non-infectious (ie, systemic inflammatory response syndrome), haemorrhage excluding haemorrhagic strokes and bleeding in the setting of coronary revascularisation.

Any death not covered by the above definitions, such as death caused by infection, malignancy, sepsis, pulmonary causes, accident, suicide, or trauma.

Any death not covered by the above definitions such as death caused by infection, malignancy, sepsis, pulmonary causes, accident, suicide or trauma.

Any death caused by infection, malignancy, sepsis, pulmonary causes, accident, suicide or trauma.

## Myocardial infarction

Defined based on the third universal definition of MI (Type 1: spontaneous MI; Type 2: MI secondary to an ischaemic imbalance; Type 3: MI resulting in death when biomarker values are unavailable; Type 4a: MI related to PCI; Type 4b: MI related to stent thrombosis; Type 4c: MI related to stent restenosis; Type 5: MI related to CABG).

Defined based on the third universal definition of MI (Type 1: spontaneous MI; Type 2: MI secondary to an ischaemic imbalance; Type 3: MI resulting in death when biomarker values are unavailable; Type 4a: MI related to PCI; Type 4b: MI related to stent thrombosis; Type 4c: MI related to stent restenosis; Type 5: MI related to CABG) with the exception of peri-procedural MI after PCI, which was defined according to the SCAI definition (1. In patients with normal baseline CK-MB: the peak CK-MB measured within 48 hours of the procedure rises to  $\geq 10x$  the local laboratory ULN, or to  $\geq 5x$  ULN with new pathologic Q-waves in  $\geq 2$  contiguous leads or new persistent LBBB, OR in the absence of CK-MB measurements and a normal baseline cTn, a cTn (I or T) level measured within 48 hours of the PCI rises

MI Classification and Criteria for Diagnosis defined by the Academic Research Consortium (ARC) as follows: Peri procedural PCI: Troponin  $>3 \times$  URL or CK-MB  $>3 \times$  URL. Peri-procedural CABG: Troponin  $>5 \times$  URL or CK-MB  $>5 \times$  URL. Spontaneous: Troponin  $>$ URL or CK-MB  $>$ URL. Reinfarction: stable or decreasing values on 2 samples and 20% increase 3 to 6 hours after a second sample diagnose recurrent MI.

As classified by Academic Research Consortium (ARC): However, the sensitivity is too high for the evaluation with Troponin of the peri-procedural MI, thus CK-MB was used.

Defined based on the third universal definition of MI (Type 1: spontaneous MI; Type 2: MI secondary to an ischaemic imbalance; Type 3: MI resulting in death when biomarker values are unavailable, Type 4a: MI related to PCI; Type 4b: MI related to stent thrombosis; Type 4c: MI related to stent restenosis; Type 5: MI related to CABG) with the exception of peri-procedural MI after PCI, which was defined according to the SCAI definition (1. In patients with normal baseline CK-MB: The peak CK-MB measured within 48 hours of the procedure rises to  $\geq 10x$  the local laboratory ULN, or to  $\geq 5x$  ULN with new pathologic Q-waves in  $\geq 2$  contiguous leads or new persistent LBBB, OR in the absence of CK-MB measurements and a normal baseline cTn, a cTn (I or T) level measured within 48 hours of the PCI rises

Defined according to the third universal definition and includes: Type 1: spontaneous MI; Type 2: MI secondary to an ischaemic imbalance; Type 3: MI resulting in death when biomarker values are unavailable; Type 4a: MI related to PCI; Type 4b: MI related to stent thrombosis; Type 5: MI related to CABG.

to  $\geq 70x$  the local laboratory ULN, or  $\geq 35x$  ULN with new pathologic Q-waves in  $\geq 2$  contiguous leads or new persistent LBBB; 2. In patients with elevated baseline CK-MB (or cTn) in whom the biomarker levels are stable or falling: the CK-MB (or cTn) rises by an absolute increment equal to those levels recommended above from the most recent pre-procedure level; 3. In patients with elevated CK-MB (or cTn) in whom the biomarker levels have not been shown to be stable or falling: the CK-MB (or cTn) rises by an absolute increment equal to those levels recommended above plus new ST-segment elevation or depression plus signs consistent with a clinically relevant MI, such as new-onset or worsening heart failure or sustained hypotension).

to  $\geq 70x$  the local laboratory ULN, or  $\geq 35x$  ULN with new pathologic Q-waves in  $\geq 2$  contiguous leads or new persistent LBBB; 2. In patients with elevated baseline CK-MB (or cTn) in whom the biomarker levels are stable or falling: the CK-MB (or cTn) rises by an absolute increment equal to those levels recommended above from the most recent pre-procedure level; 3. In patients with elevated CK-MB (or cTn) in whom the biomarker levels have not been shown to be stable or falling: the CK-MB (or cTn) rises by an absolute increment equal to those levels recommended above plus new ST-segment elevation or depression plus signs consistent with a clinically relevant MI, such as new-onset or worsening heart failure or sustained hypotension).

## Stroke

Acute episode of focal or global neurological dysfunction persisting at least 24 hours with presence of acute infarction as demonstrated by imaging.

Acute episode of focal or global neurological dysfunction caused by central nervous system (CNS) vascular injury as a result of haemorrhage or infarction. CNS includes brain, spinal cord and retina. Classified as ischaemic (acute episode of focal cerebral, spinal, or retinal dysfunction caused by CNS infarction. Evidence of infarction is defined as "Pathological, imaging, or other objective evidence of acute cerebral, spinal cord, or retinal focal ischaemic injury in a defined vascular distribution; or in absence of the above ie, imaging or autopsy unavailable- clinical evidence of cerebral, spinal cord, or retinal focal ischaemic injury is based on symptoms persisting  $\geq 24$  hours or until death, and other aetiologies excluded), haemorrhagic (cerebral haemorrhage, stroke caused by intracerebral

Sudden onset of vertigo, numbness, aphasia, dysarthria or central neurologic deficit secondary to vascular lesions of the brain such as haemorrhage, embolism, thrombosis, or rupturing aneurysm, that persists for  $>72$  hours. Haemorrhagic: a stroke with documentation on imaging (ie, CT scan or MRI of haemorrhage in the cerebral parenchyma, or a subdural or subarachnoid haemorrhage). Evidence of haemorrhagic stroke obtained from lumbar puncture, neurosurgery, or autopsy can also confirm the diagnosis. Non-haemorrhagic: a focal neurological deficit that results from a thrombus or embolus (and not due to haemorrhage) that appears and is still partially evident for more than 24 hours. Unknown/no imaging performed: if the type of stroke could not be

Acute onset of a neurological deficit that persists for at least 24 hours and is the result of a disturbance of the cerebral circulation due to ischaemia or haemorrhage. Deficits that last  $\leq 24$  hours are due to transient ischaemic neurological attack and are not classified in this category.

Sudden onset of vertigo, numbness, aphasia, dysarthria or central neurologic deficit secondary to vascular lesions of the brain such as haemorrhage, embolism, thrombosis, or rupturing aneurysm, that persist for  $>72$  hours. Haemorrhagic: a stroke with documentation on imaging (ie, CT scan or MRI of haemorrhage in the cerebral parenchyma, or a subdural or subarachnoid haemorrhage). Evidence of haemorrhagic stroke obtained from lumbar puncture, neuro surgery, or autopsy can also confirm the diagnosis. Non-haemorrhagic: a focal neurological deficit that results from a thrombus or embolus (and not due to haemorrhage) that appears and is still partially evident for more than 24 hours. Unknown/no imaging performed: if the type of stroke could not be

Acute symptomatic episode of neurological dysfunction, more than 24 hours in duration in the absence of therapeutic intervention or death, due to cerebral, spinal or retinal tissue injury as evidenced by neuroimaging or lumbar puncture. It includes the following sub-classifications: Ischaemic stroke: infarction due to prolonged ischaemia. Causes include (but are not limited to) arterial and venous thrombosis, embolism, and systemic hypoperfusion. Haemorrhagic stroke: caused by a non-traumatic intra-parenchymal, intraventricular or subarachnoid haemorrhage Undetermined: stroke with insufficient information to determine ischaemic or haemorrhagic cause.

|                 |                                                  |                                                                                                                                                                                                                                                                                                    |                                                            |                                                                   |                                                                                        |                                                                         |
|-----------------|--------------------------------------------------|----------------------------------------------------------------------------------------------------------------------------------------------------------------------------------------------------------------------------------------------------------------------------------------------------|------------------------------------------------------------|-------------------------------------------------------------------|----------------------------------------------------------------------------------------|-------------------------------------------------------------------------|
|                 |                                                  | haemorrhage, stroke caused by subarachnoid haemorrhage) or not otherwise specified (episode of acute neurological dysfunction presumed to be caused by ischaemia or haemorrhage, persisting $\geq 24$ hours or until death, but without sufficient evidence to be classified as one of the above). | determined by imaging or other means.                      |                                                                   | determined by imaging or other means (from lumbar puncture, neurosurgery, or autopsy). |                                                                         |
| <b>Bleeding</b> | Adjudicated according to the TIMI classification | Adjudicated according to the BARC, TIMI and GUSTO classification.                                                                                                                                                                                                                                  | Adjudicated according to the BARC and TIMI classification. | Adjudicated according to the BARC, TIMI and GUSTO classification. | Adjudicated according to the BARC type 3 or 5 and TIMI classification.                 | Adjudicated according to the BARC, TIMI, GUSTO and ISTH classification. |



**Stent thrombosis**

NA

Defined by the Academic Research Consortium as definite (angiographic or pathological confirmation of stent thrombosis), probable (any unexplained death within the first 30 days. Irrespective of the time after the index procedure, any MI which is related to documented acute ischaemia in the territory of the implanted stent without angiographic confirmation of stent thrombosis and in the absence of any other obvious cause) or possible (occurred with any unexplained death from 30 days following intra-coronary stenting until end of trial follow-up).

Defined by the Academic Research Consortium as definite (angiographic or pathological confirmation of stent thrombosis), probable (any unexplained death within the first 30 days. Irrespective of the time after the index procedure, any MI which is related to documented acute ischaemia in the territory of the implanted stent without angiographic confirmation of stent thrombosis and in the absence of any other obvious cause) or possible (occurred with any unexplained death from 30 days following intra-coronary stenting until end of trial follow-up).

Defined by the Academic Research Consortium as definite (angiographic or pathological confirmation of stent thrombosis), probable (any unexplained death within the first 30 days. Irrespective of the time after the index procedure, any MI which is related to documented acute ischaemia in the territory of the implanted stent without angiographic confirmation of stent thrombosis and in the absence of any other obvious cause) or possible (occurred with any unexplained death from 30 days following intra-coronary stenting until end of trial follow-up).

Defined by the Academic Research Consortium as definite (angiographic or pathological confirmation of stent thrombosis), probable (any unexplained death within the first 30 days. Irrespective of the time after the index procedure, any MI which is related to documented acute ischaemia in the territory of the implanted stent without angiographic confirmation of stent thrombosis and in the absence of any other obvious cause) or possible (occurred with any unexplained death from 30 days following intra-coronary stenting until end of trial follow-up).

Classified according to the level of certainty as: Definite stent thrombosis: is highly specific and requires angiographic/pathological confirmation of stent thrombosis in or within 5 mm of the stent in the setting of at least one of the following criteria with a 48-hour time window: acute ischaemic symptoms at rest; new ischaemic ECG changes; typical rise and fall in cardiac biomarkers. Probable stent thrombosis: any unexplained death within the first 30 days following PCI; any MI at any time following PCI that is related to documented acute ischaemia in the territory of the implanted stent, in the absence of angiographic/pathological confirmation of stent thrombosis and no other obvious cause. Possible stent thrombosis: any unexplained death after the first 30 days following PCI until the end of trial follow-up.

ARC=Academic Research Consortium; BARC=Bleeding Academy Research Consortium; CABG=coronary artery bypass grafting; CK-MB=creatinine kinase myocardial band; cTn=cardiac Troponin; DACAB=Different Antiplatelet Therapy Strategy After Coronary Artery Bypass Graft Surgery; GLASSY=GLOBAL LEADERS Adjudication Sub-Study; GUSTO=Global Use of Strategies to Open Occluded Coronary Arteries; ISTH=International Society on Thrombosis and Haemostasis; LBBB=left bundle branch block; MI=myocardial infarction; PAD=peripheral artery disease; PCI=percutaneous Coronary Intervention; SMART-CHOICE=Smart Angioplasty Research Team: Comparison Between P2Y12 Antagonist Monotherapy vs Dual Antiplatelet Therapy in Patients Undergoing Implantation of Coronary Drug-Eluting Stents; STOPDAPT-2=Short and Optimal Duration of Dual Antiplatelet Therapy After Everolimus-Eluting Cobalt-Chromium Stent; TICO=Ticagrelor Monotherapy After 3 Months in the Patients Treated With New Generation Sirolimus-eluting Stent for Acute Coronary Syndrome; TIMI=Thrombolysis in Myocardial Infarction; TWILIGHT=Ticagrelor with Aspirin or Alone in High-Risk Patients after Coronary Intervention; ULN=upper limit of normal.

**Supplementary table D.** Risk of bias in the included trials as assessed by the Cochrane risk of bias assessment tool

| <u>Study ID</u> | <u>Experimental</u> | <u>Comparator</u> | <u>Outcome</u>       | <u>Weight</u> | <u>D1</u> | <u>D2</u> | <u>D3</u> | <u>D4</u> | <u>D5</u> | <u>Overall</u> |   |
|-----------------|---------------------|-------------------|----------------------|---------------|-----------|-----------|-----------|-----------|-----------|----------------|---|
| DACAB           | P2Y12i monotherapy  | DAPT              | Death, MI, or stroke | 1.26          | +         | !         | +         | +         | +         | !              | + |
| GLASSY          | P2Y12i monotherapy  | DAPT              | Death, MI, or stroke | 32.5          | +         | !         | +         | +         | +         | !              | ! |
| SMART-CHOICE    | P2Y12i monotherapy  | DAPT              | Death, MI, or stroke | 8.64          | +         | !         | +         | +         | +         | !              | ! |
| STOPDAPT-2      | P2Y12i monotherapy  | DAPT              | Death, MI, or stroke | 11.91         | +         | !         | +         | +         | +         | !              |   |
| TICO            | P2Y12i monotherapy  | DAPT              | Death, MI, or stroke | 5.3           | +         | !         | +         | +         | +         | !              |   |
| TWILIGHT        | P2Y12i monotherapy  | DAPT              | Death, MI, or stroke | 40.38         | +         | +         | +         | +         | +         | +              |   |

D1 Randomisation process  
D2 Deviations from the intended interventions  
D3 Missing outcome data  
D4 Measurement of the outcome  
D5 Selection of the reported result

DACAB=Different Antiplatelet Therapy Strategy After Coronary Artery Bypass Graft Surgery; GLASSY=GLOBAL LEADERS Adjudication Sub-Study; SMART-CHOICE=Smart Angioplasty Research Team: Comparison Between P2Y12 Antagonist Monotherapy vs Dual Antiplatelet Therapy in Patients Undergoing Implantation of Coronary Drug-Eluting Stents; STOPDAPT-2=Short and Optimal Duration of Dual Antiplatelet Therapy After Everolimus-Eluting Cobalt-Chromium Stent; TICO=Ticagrelor Monotherapy After 3 Months in the Patients Treated With New Generation Sirolimus-eluting Stent for Acute Coronary Syndrome; TWILIGHT=Ticagrelor with Aspirin or Alone in High-Risk Patients after Coronary Intervention.

**Supplementary table E. Baseline characteristics stratified by trial**

|                        | DACAB      |            | GLASSY      |             | SMART-CHOICE |             | STOPDAPT-2  |             | TICO        |             | TWILIGHT    |             |
|------------------------|------------|------------|-------------|-------------|--------------|-------------|-------------|-------------|-------------|-------------|-------------|-------------|
|                        | P2Y12i     | DAPT       | P2Y12i      | DAPT        | P2Y12i       | DAPT        | P2Y12i      | DAPT        | P2Y12i      | DAPT        | P2Y12i      | DAPT        |
|                        | N = 166    | N = 168    | N = 3753    | N = 3756    | N = 1455     | N = 1471    | N = 1496    | N = 1507    | N = 1499    | N = 1505    | N = 3265    | N = 3267    |
| Age, years             | 63.3 (8.3) | 63.5 (8.2) | 64.9 (10.3) | 64.8 (10.3) | 64.6 (10.6)  | 64.3 (10.7) | 68.2 (10.9) | 69.1 (10.4) | 60.6 (10.8) | 61.1 (10.7) | 65.2 (10.2) | 65.2 (10.3) |
| Age ≥65 years          | 74 (45%)   | 76 (45%)   | 1968 (52%)  | 1938 (52%)  | 766 (53%)    | 725 (49%)   | 1006 (67%)  | 1075 (71%)  | 567 (38%)   | 590 (39%)   | 1713 (53%)  | 1696 (52%)  |
| Female sex             | 32 (19%)   | 34 (20%)   | 894 (24%)   | 875 (23%)   | 389 (27%)    | 380 (26%)   | 316 (21%)   | 355 (24%)   | 315 (21%)   | 299 (20%)   | 771 (24%)   | 763 (2%)    |
| Height, meters         | NA         | NA         | 1.7 (0.1)   | 1.7 (0.1)   | 1.6 (0.1)    | 1.6 (0.1)   | 1.6 (0.1)   | 1.6 (0.1)   | 1.7 (0.1)   | 1.7 (0.1)   | 1.7 (0.1)   | 1.7 (0.1)   |
| Weight, kg             | NA         | NA         | 82.1 (15.3) | 82.1 (15.1) | 65.9 (11.0)  | 66.6 (11.4) | 65.0 (12.4) | 63.9 (12.2) | 68.9 (11.6) | 68.8 (11.6) | 84.3 (19.2) | 84.0 (18.8) |
| BMI, kg/m <sup>2</sup> | NA         | NA         | 28.0 (4.5)  | 27.9 (4.5)  | 24.5 (3.1)   | 24.7 (3.2)  | 24.4 (3.5)  | 24.2 (3.5)  | 24.9 (3.2)  | 25.0 (3.3)  | 28.9 (5.6)  | 28.9 (5.6)  |
| <b>Region</b>          |            |            |             |             |              |             |             |             |             |             |             |             |
| Asia                   | 166 (100%) | 168 (100%) | 0 (0%)      | 0 (0%)      | 1455 (100%)  | 1471 (100%) | 1496 (100%) | 1507 (100%) | 1499 (100%) | 1505 (100%) | 530 (16%)   | 521 (16%)   |
| N. America             | 0 (0%)     | 0 (0%)     | 0 (0%)      | 0 (0%)      | 0 (0%)       | 0 (0%)      | 0 (0%)      | 0 (0%)      | 0 (0%)      | 0 (0%)      | 1484 (46%)  | 1488 (46%)  |
| W. Europe              | 0 (0%)     | 0 (0%)     | 3002 (80%)  | 3009 (80%)  | 0 (0%)       | 0 (0%)      | 0 (0%)      | 0 (0%)      | 0 (0%)      | 0 (0%)      | 915 (28%)   | 922 (28%)   |
| E. Europe              | 0 (0%)     | 0 (0%)     | 751 (20%)   | 747 (20%)   | 0 (0%)       | 0 (0%)      | 0 (0%)      | 0 (0%)      | 0 (0%)      | 0 (0%)      | 336 (10%)   | 336 (10%)   |
| Diabetes               | 75 (45%)   | 75 (45%)   | 912 (24%)   | 892 (24%)   | 552 (38%)    | 536 (36%)   | 584 (39%)   | 573 (38%)   | 408 (27%)   | 407 (27%)   | 1213 (37%)  | 1192 (37%)  |
| ID Diabetes            | NA         | NA         | 262 (7%)    | 267 (7%)    | 30 (5%)      | 53 (10%)    | 104 (7%)    | 98 (7%)     | 42 (3%)     | 37 (3%)     | 308 (9%)    | 342 (11%)   |
| Current smoker         | 57 (34%)   | 59 (35%)   | 1068 (29%)  | 1092 (29%)  | 411 (28%)    | 356 (24%)   | 397 (27%)   | 311 (21%)   | 545 (36%)   | 575 (38%)   | 656 (20%)   | 744 (23%)   |
| Hypercholesterolaemia  | 124 (75%)  | 121 (72%)  | 2378 (66%)  | 2454 (68%)  | 649 (45%)    | 670 (46%)   | 1114 (75%)  | 1127 (75%)  | 907 (61%)   | 912 (61%)   | 2126 (65%)  | 2113 (65%)  |
| Hypertension           | 122 (74%)  | 127 (76%)  | 2724 (73%)  | 2712 (72%)  | 892 (61%)    | 903 (61%)   | 1102 (74%)  | 1115 (74%)  | 743 (50%)   | 765 (51%)   | 2402 (74%)  | 2398 (73%)  |
| Liver disease          | NA         | NA         | 0 (0%)      | 0 (0%)      | NA           | NA          | 6 (1%)      | 4 (0%)      | 0 (0%)      | 0 (0%)      | 15 (1%)     | 8 (0%)      |
| PAD                    | 27 (16%)   | 26 (16%)   | 250 (7%)    | 297 (8%)    | 22 (2%)      | 27 (2%)     | 96 (6%)     | 100 (7%)    | NA          | NA          | 238 (7%)    | 240 (7%)    |
| Previous MI            | 60 (36%)   | 53 (32%)   | 860 (23%)   | 886 (24%)   | 60 (4%)      | 65 (4%)     | 207 (14%)   | 199 (13%)   | 62 (4%)     | 49 (3%)     | 972 (30%)   | 965 (30%)   |
| Previous PCI           | 0 (0%)     | 0 (0%)     | 1227 (33%)  | 1280 (34%)  | 154 (11%)    | 170 (12%)   | 503 (34%)   | 528 (35%)   | 134 (9%)    | 125 (8%)    | 1422 (44%)  | 1416 (43%)  |
| Previous CABG          | 0 (0%)     | 0 (0%)     | 204 (5%)    | 238 (6%)    | 18 (1%)      | 10 (1%)     | 17 (1%)     | 42 (3%)     | 8 (1%)      | 10 (1%)     | 359 (11%)   | 344 (11%)   |
| Prior stroke           | 13 (8%)    | 26 (16%)   | 96 (3%)     | 98 (3%)     | 95 (7%)      | 99 (7%)     | 80 (5%)     | 105 (7%)    | 59 (4%)     | 62 (4%)     | 0 (0%)      | 0 (0%)      |
| Prior bleeding         | 0 (0%)     | 0 (0%)     | 26 (1%)     | 22 (1%)     | 58 (4%)      | 54 (4%)     | 19 (1%)     | 28 (2%)     | 2 (0%)      | 2 (0%)      | 27 (1.0%)   | 27 (1%)     |
| History of CKD         | 3 (2%)     | 6 (4%)     | 501 (13%)   | 489 (13%)   | 41 (3%)      | 50 (4%)     | 521 (35%)   | 525 (35%)   | 280 (19%)   | 314 (21%)   | 546 (17%)   | 547 (17%)   |
| Chronic lung disease   | 5 (3%)     | 6 (4%)     | 192 (5%)    | 199 (5.3%)  | NA           | NA          | 40 (3%)     | 44 (3%)     | 0 (0%)      | 0 (0%)      | 166 (5%)    | 174 (5%)    |

| Presentation                 | n = 166           | n = 168          | n = 3753         | n = 3756         | n = 1455          | n = 1469         | n = 1496          | n = 1507          | n = 1499          | n = 1505          | n = 3264         | n = 326          |
|------------------------------|-------------------|------------------|------------------|------------------|-------------------|------------------|-------------------|-------------------|-------------------|-------------------|------------------|------------------|
| CCS                          | 63 (38%)          | 55 (33%)         | 1844 (49%)       | 1875 (59%)       | 613 (42%)         | 619 (42%)        | 934 (62%)         | 925 (61%)         | 0 (0%)            | 0 (0%)            | 1231 (38%)       | 1180 (36%)       |
| ACS                          | 103 (62%)         | 113 (67%)        | 1909 (51%)       | 1881 (50%)       | 842 (58%)         | 850 (58%)        | 562 (38%)         | 582 (39%)         | 1499 (100%)       | 1505 (100%)       | 2033 (62%)       | 2087 (64%)       |
| Unstable angina              | 97 (94%)          | 108 (96%)        | 486 (26%)        | 498 (27%)        | 458 (54%)         | 478 (56%)        | 192 (34%)         | 214 (37%)         | 437 (29%)         | 482 (32%)         | 1082 (53%)       | 1047 (50%)       |
| Non-STEMI                    | 6 (6%)            | 5 (4%)           | 750 (39%)        | 731 (39%)        | 229 (27%)         | 226 (27%)        | 81(14%)           | 99 (17%)          | 526 (35%)         | 478 (32%)         | 951 (47%)        | 1040 (50%)       |
| STEMI                        | 0 (0%)            | 0 (0%)           | 673 (35%)        | 652 (35%)        | 155 (18%)         | 146 (17%)        | 289 (51%)         | 269 (46%)         | 536 (36%)         | 545 (36%)         | 0 (0%)           | 0 (0%)           |
| Aspirin on admission         | 151 (91%)         | 151 (89%)        | 2338 (62%)       | 2390 (64%)       | 289 (20%)         | 292 (20%)        | NA                | NA                | 1442 (96%)        | 1428 (95%)        | 2361 (72%)       | 2340 (72%)       |
| PRECISE-DAPT*                | NA                | NA               | 16.6 (8.8)       | 16.2 (8.5)       | 17.1 (11.5)       | 17.1 (11.6)      | 16.6 (10.7)       | 17.3 (11.0)       | 14.6 (8.5)        | 15.3 (8.9)        | 17.0 (8.9)       | 17.0 (9.2)       |
| PRECISE-DAPT score $\geq$ 25 | NA                | NA               | 591 (17%)        | 556 (16%)        | 277 (20%)         | 278 (19%)        | 271 (18.2%)       | 295 (20%)         | 180 (12%)         | 195 (13%)         | 531 (17%)        | 556 (18%)        |
| Creatinine clearance, ml/min | 84.3 (71.9;103.0) | 85.2 (72.7;99.8) | 83.2 (69.4;97.1) | 82.6 (69.0;97.5) | 85.6 (70.0;100.9) | 84.2 (70.3;99.6) | 92.7 (75.2;110.8) | 91.7 (75.4;107.2) | 89.2 (73.6;104.8) | 87.2 (72.6;103.0) | 81.0 (68.2;95.3) | 81.1 (67.1;96.5) |
| Haemoglobin, g/dl            | 13.2 (1.4)        | 13.1 (1.4)       | 14.2 (1.5)       | 14.3 (1.6)       | 13.8 (2.1)        | 13.8 (1.8)       | 13.5 (1.8)        | 13.5 (3.9)        | 14.3 (1.7)        | 14.3 (1.8)        | 13.9 (1.6)       | 13.9 (1.7)       |
| LVEF, %                      | 61.0 (7.4)        | 60.4 (8.5)       | 52.7 (10.6)      | 53.4 (10.7)      | 60.2 (10.7)       | 60.1 (10.5)      | 59.8 (10.2)       | 59.7 (10.6)       | 54.8 (11.7)       | 54.6 (12.2)       | 54.0 (9.4)       | 53.6 (10.0)      |

Data expressed as n (%) or means $\pm$ standard deviations or median [IQR].

\*The PRECISE-DAPT score includes 5 items: age, creatinine clearance, white-blood-cell count, haemoglobin, and history of bleeding.

ACS=acute coronary syndrome; BMI=body-mass index; CABG=coronary artery bypass grafting; CCS=chronic coronary syndrome; CKD=chronic kidney disease; g/dl=grams per deciliter; LVEF=left ventricular ejection fraction; MDRD=Modification of Diet in Renal Disease; MI=myocardial infarction; ml/min=milliliter per minute; PAD=peripheral arterial disease; PCI=percutaneous coronary intervention; STEMI=ST-segment elevation myocardial infarction.

**Supplementary table F. Procedural characteristics**

|                                                   | <b>Primary study population<br/>(N=23308)</b> | <b>P2Y<sub>12</sub> Inhibitor<br/>(N=11634)</b> | <b>Aspirin + P2Y<sub>12</sub> Inhibitor<br/>(N=11674)</b> | <b>Difference (95% CI)</b> | <b>p value</b> |
|---------------------------------------------------|-----------------------------------------------|-------------------------------------------------|-----------------------------------------------------------|----------------------------|----------------|
| Radial access                                     | n=22941, 6402 (71.5%)                         | n=11451, 8153 (71.2%)                           | n=11490, 8249 (71.8%)                                     | -0.6% (-1.8% to 0.6%)      | 0.319          |
| Femoral access                                    | n=22941, 6344 (27.7%)                         | n=11451, 3199 (27.9%)                           | n=11490, 3145 (27.4%)                                     | 0.6% (-0.6% to 1.7%)       | 0.339          |
| Brachial access                                   | n=22941, 221 (1.0%)                           | n=11451, 112 (1.0%)                             | n=11490, 109 (0.9%)                                       | 0.0% (-0.2% to 0.3%)       | 0.820          |
| Unfractionated heparin                            | n=20382, 13349 (65.5%)                        | n=10179, 6690 (65.7%)                           | n=10203, 6659 (65.3%)                                     | 0.5% (-0.8% to 1.8%)       | 0.491          |
| LMWH                                              | n=17379, 1163 (6.7%)                          | n=8683, 567 (6.5%)                              | n=8696, 596 (6.9%)                                        | -0.3% (-1.1% to 0.4%)      | 0.393          |
| GP IIb/IIIa inhibitors                            | n=17379, 861 (5.0%)                           | n=8683, 417 (4.8%)                              | n=8696, 444 (5.1%)                                        | -0.3% (-0.9% to 0.3%)      | 0.357          |
| Bivalirudin                                       | n=20382, 7741 (38.0%)                         | n=10179, 3872 (38.0%)                           | n=10203, 3869 (37.9%)                                     | 0.1% (-1.2% to 1.5%)       | 0.861          |
| <b>PCI</b>                                        | <b>(n=22974)</b>                              | <b>n=11468</b>                                  | <b>n=11468</b>                                            |                            |                |
| Number of vessels treated at index PCI            | n=22909                                       | n=11435                                         | n=11474                                                   |                            | 0.123          |
| One vessel                                        | 18874 (82.4%)                                 | 9460 (82.7%)                                    | 9414 (82.0%)                                              | 0.7% (-0.3% to 1.7%)       | 0.176          |
| Two vessels                                       | 3682 (16.1%)                                  | 1816 (15.9%)                                    | 1866 (16.3%)                                              | -0.4% (-1.3% to 0.6%)      | 0.439          |
| Three vessels or more                             | 353 (1.5%)                                    | 159 (1.4%)                                      | 194 (1.7%)                                                | -0.3% (-0.6% to 0.0%)      | 0.068          |
| Number of lesions treated at index PCI            | n=22915                                       | n=11438                                         | n=11477                                                   |                            | 0.702          |
| One lesion                                        | 16660 (72.7%)                                 | 8343 (72.9%)                                    | 8317 (72.5%)                                              | 0.5% (-0.7% to 1.6%)       | 0.423          |
| Two lesions                                       | 4917 (21.5%)                                  | 2429 (21.2%)                                    | 2488 (21.7%)                                              | -0.4% (-1.5% to 0.6%)      | 0.421          |
| Three or more lesions                             | 1338 (5.8%)                                   | 666 (5.8%)                                      | 672 (5.9%)                                                | -0.0% (-0.6% to 0.6%)      | 0.933          |
| LAD                                               | n=22974, 12283 (53.5%)                        | n=11468, 6093 (53.1%)                           | n=11506, 6190 (53.8%)                                     | -0.7% (-2.0% to 0.6%)      | 0.310          |
| Left circumflex artery                            | n=22974, 6302 (27.4%)                         | n=11468, 3145 (27.4%)                           | n=11506, 3157 (27.4%)                                     | 0.0% (-1.2% to 1.1%)       | 0.981          |
| Right coronary artery                             | n=22974, 7792 (33.9%)                         | n=11468, 3890 (33.9%)                           | n=11506, 3902 (33.9%)                                     | 0.0% (-1.2% to 1.2%)       | 0.990          |
| Left main                                         | n=22974, 724 (3.2%)                           | n=11468, 349 (3.0%)                             | n=11506, 375 (3.3%)                                       | -0.2% (-0.7% to 0.2%)      | 0.349          |
| Venous or arterial graft                          | n=20048, 230 (1.1%)                           | n=10013, 109 (1.1%)                             | n=10035, 121 (1.2%)                                       | 0.1% (-0.2% to 0.4%)       | 0.436          |
| Bifurcation                                       | n=22921, 3580 (15.6%)                         | n=11440, 1778 (15.5%)                           | n=11481, 1802 (15.7%)                                     | -0.2% (-1.1% to 0.8%)      | 0.749          |
| Bifurcation lesion treated with at least 2 stents | n=20048, 664 (3.3%)                           | n=10013, 330 (3.3%)                             | n=10035, 334 (3.3%)                                       | -0.0% (-0.5% to 0.5%)      | 0.897          |
| Thrombus                                          | n=22923, 3106 (13.5%)                         | n=11441, 1527 (13.3%)                           | n=11482, 1579 (13.8%)                                     | -0.5% (-1.3% to 0.5%)      | 0.370          |
| TIMI pre-PCI 0-1                                  | n=18846, 4034 (21.4%)                         | n=9397, 2052 (21.8%)                            | n=9449, 1982 (21.0%)                                      | 0.9% (-0.3% to 2.0%)       | 0.150          |

|                                               |                              |                              |                              |                           |        |
|-----------------------------------------------|------------------------------|------------------------------|------------------------------|---------------------------|--------|
| N. of implanted stents                        | n=16349, 1.0 (1.0 to 2.0)    | n=8159, 1.0 (1.0 to 2.0)     | n=8190, 1.0 (1.0 to 2.0)     | 0.01 (-0.02 to 0.03)      | 0.387  |
| Overlapping stents                            | n=16442, 4230 (25.7%)        | n=8203, 2165 (26.4%)         | n=8239, 2065 (25.1%)         | 1.3% (0.0% to 2.7%)       | 0.051  |
| Total stent length                            | n=22879, 28.0 (18.0 to 45.0) | n=11424, 28.0 (18.0 to 46.0) | n=11455, 28.0 (18.0 to 45.0) | 0.06 (-0.54 to 0.65)      | 0.612  |
| New generation DES                            | n=22881, 22831 (99.8%)       | n=11424, 11403 (99.8%)       | n=11457, 11428 (99.7%)       | 0.1% (-0.1% to 0.2%)      | 0.262  |
| Minimum diameter of all implanted stents (SD) | n=22879, 2.92 (0.48)         | n=11424, 2.93 (0.48)         | n=11455, 2.92 (0.48)         | 0.00 (-0.01 to 0.01)      | 0.947  |
| Maximum diameter of all implanted stents (SD) | n=22879, 3.13 (0.48)         | n=11424, 3.13 (0.48)         | n=11455, 3.13 (0.48)         | 0.00 (-0.01 to 0.01)      | 0.952  |
| Aspirin at randomisation                      | n=23308, 11674 (50.1%)       | n=11634, 0 (0.0%)            | n=11674, 11674 (100%)        | -100% (-100% to -100%)    | <0.001 |
| P2Y <sub>12</sub> at randomisation            | n=23308, 23308 (100.0%)      | n=11634, 11634 (100%)        | n=11674, 11674 (100%)        | 0.0% (0.0% to 0.0%)       | -      |
| Clopidogrel                                   | n=23308, 6883 (29.5%)        | n=11634, 2586 (22.2%)        | n=11674, 4297 (36.8%)        | -14.6% (-15.7% to -13.4%) | <0.001 |
| Prasugrel                                     | n=23308, 232 (1.0%)          | n=11634, 92 (0.8%)           | n=11674, 140 (1.2%)          | -0.4% (-0.7% to -0.2%)    | 0.002  |
| Ticagrelor                                    | n=23308, 16193 (69.5%)       | n=11634, 8956 (77.0%)        | n=11674, 7237 (62.0%)        | 15.0% (13.8% to 16.2%)    | <0.001 |
| ACE-inhibitors or ARBs at randomisation       | n=23289, 14901 (64.0%)       | n=11623, 7495 (64.5%)        | n=11666, 7406 (63.5%)        | 1.0% (-0.2% to 2.2%)      | 0.112  |
| β-blockers at randomisation                   | n=23292, 16183 (69.5%)       | n=11625, 8078 (69.5%)        | n=11667, 8105 (69.5%)        | 0.0% (-1.2% to 1.2%)      | 0.975  |
| Statins at randomisation                      | n=22986, 21765 (94.7%)       | n=11476, 10866 (94.7%)       | n=11510, 10899 (94.7%)       | 0.0% (-0.6% to 0.6%)      | 0.981  |
| PPI at randomisation                          | n=16891, 10013 (59.3%)       | n=8433, 5034 (59.7%)         | n=8458, 4979 (58.9%)         | 0.8% (-0.7% to 2.3%)      | 0.274  |
| <b>CABG</b>                                   | <b>(n=334)</b>               | <b>(n=166)</b>               | <b>(n=168)</b>               |                           |        |
| LIMA                                          | n=334, 285 (85.3%)           | n=166, 144 (86.7%)           | n=168, 141 (83.9%)           | 2.8% (-4.8% to 10.4%)     | 0.467  |
| Number of arterial grafts                     | n=334, 1.0 (1.0 to 1.0)      | n=166, 1.0 (1.0 to 1.0)      | n=168, 1.0 (1.0 to 1.0)      | 0.03 (-0.05 to 0.12)      | 0.602  |
| Number of venous grafts                       | n=334, 3.0 (2.0 to 3.0)      | n=166, 3.0 (2.0 to 3.0)      | n=168, 3.0 (2.0 to 3.0)      | 0.04 (-0.14 to 0.22)      | 0.726  |
| On-pump CABG                                  | n=334, 259 (77.5%)           | n=166, 130 (78.3%)           | n=168, 129 (76.8%)           | 1.5% (-7.4% to 10.5%)     | 0.738  |

Data expressed as n (%) or means±standard deviations or median [IQR]

ACS=acute coronary syndrome; BMI=body-mass index; CABG=coronary artery bypass grafting; CCS=chronic coronary syndrome; CKD=chronic kidney disease; DES=drug-eluting stent; GP=glycoprotein; LAD=left anterior descending artery; LIMA=left internal mammary artery; LMWH=low-molecular-weight heparin; LVEF=left ventricular ejection fraction; MDRD=Modification of Diet in Renal Disease; MI=myocardial infarction; PAD=peripheral arterial disease; PCI=percutaneous coronary intervention; PPI=proton pump inhibitors; STEMI=ST-segment elevation myocardial infarction; TIMI=Thrombolysis in Myocardial Infarction.

**Supplementary table G. Procedural characteristics stratified by trial**

|                                                   | DACAB             |                 | GLASSY             |                  | SMART-CHOICE       |                  | STOPDAPT-2         |                  | TICO               |                  | TWILIGHT           |                  |
|---------------------------------------------------|-------------------|-----------------|--------------------|------------------|--------------------|------------------|--------------------|------------------|--------------------|------------------|--------------------|------------------|
|                                                   | P2Y12i<br>N = 166 | DAPT<br>N = 168 | P2Y12i<br>N = 3753 | DAPT<br>N = 3756 | P2Y12i<br>N = 1455 | DAPT<br>N = 1471 | P2Y12i<br>N = 1496 | DAPT<br>N = 1507 | P2Y12i<br>N = 1499 | DAPT<br>N = 1505 | P2Y12i<br>N = 3265 | DAPT<br>N = 3267 |
| Radial access                                     | NA                | NA              | 2728 (73%)         | 2765 (74%)       | 1065 (73%)         | 1074 (73%)       | 1216 (81%)         | 1254 (83%)       | 821 (55%)          | 851 (56%)        | 2323 (71.1%)       | 2305 (70.6%)     |
| Femoral access                                    | NA                | NA              | 998 (27%)          | 959 (26%)        | 390 (27%)          | 397 (27%)        | 201 (13%)          | 180 (12%)        | 678 (45%)          | 654 (43%)        | 932 (28%)          | 955 (29%)        |
| Brachial access                                   | NA                | NA              | 30 (1%)            | 35 (1%)          | 0 (0%)             | 0 (0%)           | 79 (5%)            | 73 (5%)          | 0 (0%)             | 0 (0%)           | 3 (0.1%)           | 1 (0%)           |
| Unfractionated heparin                            | 166 (100%)        | 168 (100%)      | 1297 (35%)         | 1280 (34%)       | NA                 | NA               | 1496 (100%)        | 1507 (100%)      | 930 (62%)          | 936 (62%)        | 2801 (86%)         | 2768 (85%)       |
| LMWH                                              | 0 (0%)            | 0 (0%)          | 16 (0.4%)          | 20 (0.5%)        | NA                 | NA               | NA                 | NA               | 120 (8%)           | 139 (9%)         | 431 (13%)          | 437 (13%)        |
| GP IIb/IIIa inhibitors                            | 0 (0%)            | 0 (0%)          | 100 (3%)           | 109 (3%)         | NA                 | NA               | NA                 | NA               | 99 (7%)            | 96 (6%)          | 218 (7%)           | 239 (7%)         |
| Bivalirudin                                       | 0 (0%)            | 0 (0%)          | 3468 (92%)         | 3446 (92%)       | NA                 | NA               | 0 (0%)             | 0 (0%)           | 0 (0%)             | 0 (0%)           | 404 (12%)          | 423 (13%)        |
| <b>PCI</b>                                        | n = 0             | n = 0           | n = 3753           | n = 3756         | n = 1455           | n = 1471         | n = 1496           | n = 1507         | n = 1499           | n = 1505         | n = 3265           | n = 3267         |
| N. vessels treated at index PCI                   | NA                | NA              | n = 3723           | n = 3727         | n = 1455           | n = 1471         | n = 1493           | n = 1504         | n = 1499           | n = 1505         | n = 3265           | n = 3267         |
| One vessel                                        | NA                | NA              | 3190 (86%)         | 3177 (85%)       | 1141 (78%)         | 1126 (76%)       | 1420 (95%)         | 1409 (94%)       | 1249 (83%)         | 1242 (82%)       | 2460 (75%)         | 2460 (75%)       |
| Two vessels                                       | NA                | NA              | 506 (14%)          | 517 (14%)        | 285 (20%)          | 305 (21%)        | 68 (5%)            | 90 (6%)          | 229 (15%)          | 239 (16%)        | 728 (22%)          | 715 (22%)        |
| Three vessels or more                             | NA                | NA              | 27 (0.7%)          | 33 (0.9%)        | 29 (2%)            | 40 (3%)          | 5 (0.3%)           | 5 (0.3%)         | 21 (1%)            | 24 (2%)          | 77 (2%)            | 92 (3%)          |
| N. lesions treated at index PCI                   | n = 0             | n = 0           | n = 3723           | n = 3740         | n = 1455           | n = 1471         | n = 1496           | n = 1507         | n = 1499           | n = 1505         | n = 3265           | n = 3267         |
| One lesion                                        | NA                | NA              | 2824 (76%)         | 2818 (76%)       | 1041 (71%)         | 1022 (69%)       | 1339 (89%)         | 1323 (88%)       | 1197 (80%)         | 1197 (79%)       | 1942 (59%)         | 1957 (60%)       |
| Two lesions                                       | NA                | NA              | 722 (19%)          | 711 (19%)        | 315 (22%)          | 346 (23%)        | 141 (9%)           | 168 (11%)        | 257 (17%)          | 257 (17%)        | 994 (30%)          | 1006 (31%)       |
| Three or more lesions                             | NA                | NA              | 177 (5%)           | 198 (5%)         | 99 (7%)            | 103 (7%)         | 16 (1%)            | 16 (1%)          | 45 (3%)            | 51 (3%)          | 329 (10%)          | 304 (9%)         |
| LAD                                               | NA                | NA              | 1712 (46%)         | 1721 (46%)       | 877 (60%)          | 934 (63%)        | 825 (55%)          | 853 (57%)        | 860 (57%)          | 862 (57%)        | 1819 (56%)         | 1820 (56%)       |
| Left circumflex artery                            | NA                | NA              | 1090 (29%)         | 1098 (29%)       | 388 (27%)          | 370 (25%)        | 268 (18%)          | 305 (20%)        | 345 (23%)          | 339 (22%)        | 1054 (32%)         | 1045 (32%)       |
| Right coronary artery                             | NA                | NA              | 1288 (34%)         | 1276 (34%)       | 509 (35%)          | 514 (35%)        | 435 (29%)          | 409 (27%)        | 518 (35%)          | 546 (36%)        | 1140 (35%)         | 1157 (35%)       |
| Left main                                         | NA                | NA              | 99 (3%)            | 107 (3%)         | 22 (1%)            | 35 (2%)          | 43 (3%)            | 37 (2%)          | 48 (3%)            | 44 (3%)          | 137 (4%)           | 152 (5%)         |
| Venous or arterial graft                          | NA                | NA              | 44 (1%)            | 46 (1%)          | 0 (0%)             | 0 (0%)           | 3 (0.2%)           | 3 (0.2%)         | 0 (0%)             | 0 (0%)           | 62 (2%)            | 72 (2%)          |
| Bifurcation                                       | NA                | NA              | 560 (15%)          | 570 (15%)        | 192 (13%)          | 180 (12%)        | 374 (25%)          | 392 (26%)        | 250 (17%)          | 272 (18%)        | 402 (12%)          | 388 (12%)        |
| Bifurcation lesion treated with at least 2 stents | NA                | NA              | 184 (5%)           | 192 (5%)         | NA                 | NA               | 9 (0.6%)           | 7 (0.5%)         | 28 (2%)            | 25 (2%)          | 109 (3%)           | 110 (3%)         |
| Thrombus                                          | NA                | NA              | 301 (8%)           | 349 (9%)         | 108 (7%)           | 111 (7%)         | 207 (14%)          | 203 (13%)        | 558 (37%)          | 545 (36%)        | 353 (11%)          | 371 (11%)        |



|                                               |               |               |                 |                  |                  |                  |                  |                  |                  |                  |                  |                  |
|-----------------------------------------------|---------------|---------------|-----------------|------------------|------------------|------------------|------------------|------------------|------------------|------------------|------------------|------------------|
| TIMI pre-PCI 0-1                              | NA            | NA            | 636 (18%)       | 655 (18%)        | NA               | NA               | 271 (18%)        | 259 (17%)        | 694 (46%)        | 652 (43%)        | 451 (16%)        | 416 (15%)        |
| N. of implanted stents                        | NA            | NA            | 1.0 (1.0;2.0)   | 1.0 (1.0;2.0)    | 1.0 (1.0;2.0)    | 1.0 (1.0;2.0)    | 1.0 (1.0;1.0)    | 1.0 (1.0;1.0)    | 1.0 (1.0;2.0)    | 1.0 (1.0;2.0)    | NA               | NA               |
| Overlapping stents                            | NA            | NA            | 1633 (43%)      | 1588 (42%)       | 156 (11%)        | 134 (9%)         | 216 (14%)        | 191 (13%)        | 160 (11%)        | 152 (10%)        | NA               | NA               |
| Total stent length                            | NA            | NA            | 28.0 (18.0;2.0) | 28.0 (18.0;44.0) | 32.0 (22.0;48.0) | 30.0 (22.0;48.0) | 24.0 (18.0;38.0) | 28.0 (18.0;38.0) | 26.0 (22.0;40.0) | 30.0 (22.0;40.0) | 33.0 (22.0;50.0) | 33.0 (20.0;50.0) |
| New generation DES                            | NA            | NA            | 3709 (100%)     | 3707 (100%)      | 1455 (100%)      | 1471 (100%)      | 1496 (100%)      | 1507 (100%)      | 1499 (100%)      | 1505 (100%)      | 3244 (99%)       | 3238 (99%)       |
| Minimum diameter of all implanted stents (SD) | NA            | NA            | 2.9 (0.5)       | 2.9 (0.5)        | 3.0 (0.5)        | 3.0 (0.5)        | 3.0 (0.5)        | 3.0 (0.5)        | 3.1 (0.5)        | 3.1 (0.4)        | 2.8 (0.5)        | 2.8 (0.5)        |
| Maximum diameter of all implanted stents (SD) | NA            | NA            | 3.1 (0.5)       | 3.1 (0.5)        | 3.2 (0.5)        | 3.2 (0.5)        | 3.1 (0.5)        | 3.1 (0.4)        | 3.2 (0.4)        | 3.2 (0.4)        | 3.1 (0.5)        | 3.1 (0.5)        |
| Aspirin                                       | 0 (0%)        | 168 (100%)    | 0 (0%)          | 3756 (100%)      | 0 (0%)           | 1471 (100%)      | 0 (0%)           | 1507 (100%)      | 0 (0%)           | 1505 (100%)      | 0 (0%)           | 3267 (100%)      |
| P2Y <sub>12</sub>                             | 166 (100%)    | 168 (100%)    | 3753 (100%)     | 3756 (100%)      | 1455 (100%)      | 1471 (100%)      | 1496 (100%)      | 1507 (100%)      | 1499 (100%)      | 1505 (100%)      | 3265 (100%)      | 3267 (100%)      |
| Clopidogrel                                   | 0 (0%)        | 0 (0%)        | 0 (0%)          | 1722 (46%)       | 1122 (77%)       | 1143 (78%)       | 1464 (98%)       | 1432 (95%)       | 0 (0%)           | 0 (0%)           | 0 (0%)           | 0 (0%)           |
| Prasugrel                                     | 0 (0%)        | 0 (0%)        | 0 (0%)          | 0 (0%)           | 60 (4%)          | 65 (4%)          | 32 (2%)          | 75 (5%)          | 0 (0%)           | 0 (0%)           | 0 (0%)           | 0 (0%)           |
| Ticagrelor                                    | 166 (100%)    | 168 (100%)    | 3753 (100%)     | 2034 (54%)       | 273 (19%)        | 263 (18%)        | 0 (0%)           | 0 (0%)           | 1499 (100%)      | 1505 (100%)      | 3265 (100%)      | 3267 (100%)      |
| ACE-inhibitors or ARBs                        | 98 (59%)      | 87 (52%)      | 2283 (61%)      | 2267 (60%)       | 831 (57%)        | 787 (53%)        | 943 (63%)        | 957 (63%)        | 998 (67%)        | 991 (66%)        | 2342 (72%)       | 2317 (71%)       |
| β-blockers                                    | 149 (90%)     | 153 (91%)     | 2923 (78%)      | 2951 (79%)       | 767 (53%)        | 769 (52%)        | 671 (45%)        | 642 (43%)        | 990 (66%)        | 991 (66%)        | 2578 (79%)       | 2599 (80%)       |
| Statins                                       | 155 (93%)     | 157 (93%)     | 3456 (92%)      | 3463 (92%)       | 1379 (95%)       | 1384 (94%)       | 1314 (98%)       | 1316 (98%)       | 1466 (98%)       | 1477 (98%)       | 3096 (95%)       | 3102 (95%)       |
| PPI                                           | 108 (65%)     | 104 (62%)     | 2069 (55%)      | 2037 (54%)       | NA               | NA               | 1187 (95%)       | 1191 (94%)       | NA               | NA               | 1670 (51%)       | 1647 (50%)       |
| <b>CABG</b>                                   | n = 166       | n = 168       | n = 0           | n = 0            | n = 0            | n = 0            | n = 0            | n = 0            | n = 0            | n = 0            | n = 0            | n = 0            |
| LIMA                                          | 144 (87%)     | 141 (84%)     | NA              | NA               | NA               | NA               | NA               | NA               | NA               | NA               | NA               | NA               |
| Number of arterial grafts                     | 1.0 (1.0;1.0) | 1.0 (1.0;1.0) | NA              | NA               | NA               | NA               | NA               | NA               | NA               | NA               | NA               | NA               |
| Number of venous grafts                       | 3.0 (2.0;3.0) | 3.0 (2.0;3.0) | NA              | NA               | NA               | NA               | NA               | NA               | NA               | NA               | NA               | NA               |
| On-pump CABG                                  | 130 (78%)     | 129 (78%)     | NA              | NA               | NA               | NA               | NA               | NA               | NA               | NA               | NA               | NA               |

Data expressed as n (%) or means±standard deviations or median [IQR]

ACS=acute coronary syndrome; BMI=body-mass index; CABG=coronary artery bypass grafting; CCS=chronic coronary syndrome; CKD=chronic kidney disease; DES=drug-eluting stent; GP=glycoprotein; LAD=left anterior descending artery; LIMA=left internal mammary artery; LMWH=low-molecular-weight heparin; LVEF=left ventricular ejection fraction; MDRD=Modification of Diet in Renal Disease; MI=myocardial infarction; PAD=peripheral arterial disease; PCI=percutaneous coronary intervention; PPI=proton pump inhibitors; STEMI=ST-segment elevation myocardial infarction; TIMI=Thrombolysis in Myocardial Infarction.

**Supplementary table H.** One step mixed-effect Cox regression model for the ITT population including the initial DAPT phase after randomisation in GLASSY, SMART-CHOICE, STOPDAPT-2, and TICO trials

| <b>Outcome</b>        | <b>P2Y<sub>12</sub> Inhibitor<br/>(N=11747)</b> | <b>Aspirin +<br/>P2Y<sub>12</sub> Inhibitor<br/>(N=11762)</b> | <b>HR (95% CI)</b>  | <b>Tau<sup>2</sup></b> | <b>p value</b> |
|-----------------------|-------------------------------------------------|---------------------------------------------------------------|---------------------|------------------------|----------------|
| Death, MI, or stroke  | 398 (3.98%)                                     | 430 (4.29%)                                                   | 0.97 (0.84 to 1.11) | 0.00                   | 0.644          |
| Death or MI           | 336 (3.36%)                                     | 373 (3.72%)                                                   | 0.95 (0.82 to 1.10) | 0.00                   | 0.477          |
| Death                 |                                                 |                                                               |                     |                        |                |
| All cause             | 146 (1.26%)                                     | 179 (1.54%)                                                   | 0.82 (0.66 to 1.02) | 0.00                   | 0.072          |
| Cardiovascular        | 93 (0.8%)                                       | 126 (1.08%)                                                   | 0.74 (0.57 to 0.97) | 0.00                   | 0.027          |
| Non-cardiovascular    | 53 (0.46%)                                      | 52 (0.45%)                                                    | 1.02 (0.70 to 1.50) | 0.05                   | 0.907          |
| Myocardial infarction | 205 (1.78%)                                     | 220 (1.91%)                                                   | 0.93 (0.77 to 1.13) | 0.00                   | 0.482          |
| Stroke                |                                                 |                                                               |                     |                        |                |
| Any                   | 75 (0.65%)                                      | 68 (0.59%)                                                    | 1.11 (0.80 to 1.54) | 0.11                   | 0.546          |
| Ischaemic             | 51 (0.51%)                                      | 52 (0.51%)                                                    | 0.98 (0.67 to 1.45) | 0.07                   | 0.932          |
| Haemorrhagic          | 12 (0.12%)                                      | 4 (0.04%)                                                     | 3.01 (0.97 to 9.32) | 0.00                   | 0.057          |
| Stent thrombosis      |                                                 |                                                               |                     |                        |                |
| Definite              | 42 (0.37%)                                      | 45 (0.39%)                                                    | 0.93 (0.61 to 1.42) | 0.00                   | 0.752          |
| Probable              | 19 (0.17%)                                      | 16 (0.14%)                                                    | 1.19 (0.61 to 2.31) | 0.00                   | 0.608          |
| Possible              | 27 (0.32%)                                      | 48 (0.57%)                                                    | 0.56 (0.35 to 0.90) | 0.00                   | 0.017          |
| Definite or probable  | 59 (0.51%)                                      | 59 (0.51%)                                                    | 1.00 (0.70 to 1.44) | 0.00                   | 0.995          |
| Any                   | 80 (0.81%)                                      | 103 (1.04%)                                                   | 0.78 (0.58 to 1.04) | 0.02                   | 0.092          |
| BARC bleeding         |                                                 |                                                               |                     |                        |                |
| 2, 3 or 5             | 430 (4.41%)                                     | 620 (6.42%)                                                   | 0.61 (0.48 to 0.79) | 0.10                   | <0.001         |
| 3 or 5                | 177 (1.56%)                                     | 268 (2.36%)                                                   | 0.66 (0.55 to 0.80) | 0.08                   | <0.001         |
| 5                     | 8 (0.08%)                                       | 10 (0.12%)                                                    | 0.80 (0.32 to 2.03) | 0.67                   | 0.642          |
| TIMI bleeding         |                                                 |                                                               |                     |                        |                |
| Major                 | 85 (0.84%)                                      | 128 (1.27%)                                                   | 0.67 (0.51 to 0.88) | 0.19                   | 0.004          |
| Minor                 | 167 (1.67%)                                     | 272 (2.72%)                                                   | 0.61 (0.50 to 0.74) | 0.00                   | <0.001         |
| Major or minor        | 250 (2.92%)                                     | 395 (4.63%)                                                   | 0.74 (0.50 to 1.11) | 0.07                   | 0.143          |
| NACE                  | 544 (4.77%)                                     | 652 (5.73%)                                                   | 0.83 (0.74 to 0.94) | 0.00                   | 0.002          |

P-values are two-sided for superiority.

BARC=Bleeding Academy Research Consortium; CI=confidence interval; HR=hazard ratio; ITT=intention to treat; MI=myocardial infarction;

NACE=net adverse clinical events, defined as a composite of all-cause death, myocardial infarction, stroke, or BARC type 3 or 5 bleeding;

TIMI=Thrombolysis in Myocardial Infarction.

**Supplementary table I.** One step mixed-effect Cox regression model for the ITT population excluding patients with MI, ischaemic stroke, or TVR occurring during the initial DAPT phase after randomisation in GLASSY, SMART-CHOICE, STOPDAPT-2 and TICO trials

| <b>Outcome</b>        | <b>P2Y<sub>12</sub> Inhibitor<br/>(N=11574)</b> | <b>Aspirin +<br/>P2Y<sub>12</sub> Inhibitor<br/>(N=11608)</b> | <b>HR (95% CI)</b>   | <b>Tau<sup>2</sup></b> | <b>p value</b> |
|-----------------------|-------------------------------------------------|---------------------------------------------------------------|----------------------|------------------------|----------------|
| Death, MI, or stroke  | 301 (2.93%)                                     | 331 (3.32%)                                                   | 0.91 (0.78 to 1.07)  | 0.00                   | 0.257          |
| Death or MI           | 257 (2.48%)                                     | 293 (2.97%)                                                   | 0.88 (0.74 to 1.04)  | 0.00                   | 0.136          |
| Death                 |                                                 |                                                               |                      |                        |                |
| All cause             | 106 (0.98%)                                     | 134 (1.38%)                                                   | 0.81 (0.62 to 1.04)  | 0.00                   | 0.099          |
| Cardiovascular        | 60 (0.56%)                                      | 87 (0.88%)                                                    | 0.70 (0.50 to 0.97)  | 0.00                   | 0.034          |
| Non-cardiovascular    | 42 (0.38%)                                      | 42 (0.46%)                                                    | 1.03 (0.67 to 1.58)  | 0.15                   | 0.895          |
| Myocardial infarction | 166 (1.63%)                                     | 177 (1.76%)                                                   | 0.94 (0.76 to 1.16)  | 0.01                   | 0.572          |
| Stroke                |                                                 |                                                               |                      |                        |                |
| Any                   | 51 (0.51%)                                      | 44 (0.4%)                                                     | 1.12 (0.75 to 1.68)  | 0.09                   | 0.585          |
| Ischaemic             | 38 (0.39%)                                      | 35 (0.32%)                                                    | 1.03 (0.65 to 1.65)  | 0.07                   | 0.891          |
| Haemorrhagic          | 6 (0.05%)                                       | 2 (0.02%)                                                     | 2.53 (0.49 to 13.03) | 0.00                   | 0.268          |
| Stent thrombosis      |                                                 |                                                               |                      |                        |                |
| Definite              | 23 (0.24%)                                      | 26 (0.29%)                                                    | 0.85 (0.48 to 1.50)  | 0.00                   | 0.568          |
| Probable              | 6 (0.05%)                                       | 6 (0.05%)                                                     | 0.84 (0.26 to 2.74)  | 0.00                   | 0.768          |
| Possible              | 26 (0.26%)                                      | 47 (0.51%)                                                    | 0.55 (0.34 to 0.90)  | 0.00                   | 0.016          |
| Definite or probable  | 27 (0.27%)                                      | 31 (0.33%)                                                    | 0.84 (0.50 to 1.41)  | 0.00                   | 0.512          |
| Any                   | 51 (0.51%)                                      | 77 (0.84%)                                                    | 0.65 (0.46 to 0.93)  | 0.00                   | 0.018          |
| BARC bleeding         |                                                 |                                                               |                      |                        |                |
| 2, 3 or 5             | 294 (2.92%)                                     | 491 (4.76%)                                                   | 0.59 (0.51 to 0.69)  | 0.00                   | <0.001         |
| 3 or 5                | 97 (0.89%)                                      | 195 (1.83%)                                                   | 0.50 (0.39 to 0.63)  | 0.03                   | <0.001         |
| 5                     | 3 (0.03%)                                       | 5 (0.06%)                                                     | 0.67 (0.11 to 4.01)  | 0.00                   | 0.661          |
| TIMI bleeding         |                                                 |                                                               |                      |                        |                |
| Major                 | 44 (0.45%)                                      | 93 (0.95%)                                                    | 0.47 (0.33 to 0.68)  | 0.28                   | <0.001         |
| Minor                 | 136 (1.44%)                                     | 241 (2.4%)                                                    | 0.56 (0.46 to 0.69)  | 0.00                   | <0.001         |
| Major or minor        | 179 (1.89%)                                     | 330 (3.34%)                                                   | 0.54 (0.45 to 0.64)  | 0.03                   | <0.001         |
| NACE                  | 382 (3.69%)                                     | 495 (4.89%)                                                   | 0.77 (0.68 to 0.88)  | 0.02                   | <0.001         |

P-values are two-sided for superiority.

BARC=Bleeding Academy Research Consortium; CI=confidence interval; HR=hazard ratio; ITT=intention to treat; MI=myocardial infarction; NACE=net adverse clinical events, defined as a composite of all-cause death, myocardial infarction, stroke, or BARC type 3 or 5 bleeding; TIMI=Thrombolysis in Myocardial Infarction; TVR=target vessel revascularisation.

**Supplementary table J.** One step mixed-effect Cox regression model for the ITT population excluding patients with MI or ischaemic stroke, occurring during the initial DAPT phase after randomisation in GLASSY, SMART-CHOICE, STOPDAPT-2, and TICO trials

| <b>Outcome</b>        | <b>P2Y<sub>12</sub> Inhibitor<br/>(N=11585)</b> | <b>Aspirin +<br/>P2Y<sub>12</sub> Inhibitor<br/>(N=11623)</b> | <b>HR (95% CI)</b>   | <b>Tau<sup>2</sup></b> | <b>p value</b> |
|-----------------------|-------------------------------------------------|---------------------------------------------------------------|----------------------|------------------------|----------------|
| Death, MI, or stroke  | 301 (2.93%)                                     | 333 (3.33%)                                                   | 0.91 (0.78 to 1.06)  | 0.00                   | 0.227          |
| Death or MI           | 257 (2.48%)                                     | 294 (2.97%)                                                   | 0.88 (0.74 to 1.04)  | 0.00                   | 0.126          |
| Death                 |                                                 |                                                               |                      |                        |                |
| All cause             | 106 (0.98%)                                     | 134 (1.38%)                                                   | 0.81 (0.62 to 1.04)  | 0.00                   | 0.100          |
| Cardiovascular        | 60 (0.56%)                                      | 87 (0.88%)                                                    | 0.70 (0.50 to 0.97)  | 0.00                   | 0.034          |
| Non-cardiovascular    | 42 (0.38%)                                      | 42 (0.46%)                                                    | 1.03 (0.67 to 1.58)  | 0.15                   | 0.893          |
| Myocardial infarction | 166 (1.63%)                                     | 178 (1.77%)                                                   | 0.94 (0.76 to 1.16)  | 0.01                   | 0.538          |
| Stroke                |                                                 |                                                               |                      |                        |                |
| Any                   | 51 (0.51%)                                      | 45 (0.41%)                                                    | 1.10 (0.73 to 1.64)  | 0.09                   | 0.659          |
| Ischaemic             | 38 (0.39%)                                      | 36 (0.33%)                                                    | 1.00 (0.63 to 1.59)  | 0.07                   | 0.984          |
| Haemorrhagic          | 6 (0.05%)                                       | 2 (0.02%)                                                     | 2.53 (0.49 to 13.03) | 0.00                   | 0.268          |
| Stent thrombosis      |                                                 |                                                               |                      |                        |                |
| Definite              | 23 (0.24%)                                      | 26 (0.29%)                                                    | 0.85 (0.48 to 1.50)  | 0.00                   | 0.568          |
| Probable              | 6 (0.05%)                                       | 6 (0.05%)                                                     | 0.84 (0.26 to 2.74)  | 0.00                   | 0.769          |
| Possible              | 26 (0.26%)                                      | 47 (0.51%)                                                    | 0.55 (0.34 to 0.90)  | 0.00                   | 0.016          |
| Definite or probable  | 27 (0.27%)                                      | 31 (0.33%)                                                    | 0.84 (0.50 to 1.42)  | 0.00                   | 0.513          |
| Any                   | 51 (0.51%)                                      | 77 (0.84%)                                                    | 0.65 (0.46 to 0.93)  | 0.00                   | 0.018          |
| BARC bleeding         |                                                 |                                                               |                      |                        |                |
| 2, 3 or 5             | 295 (2.92%)                                     | 492 (4.77%)                                                   | 0.60 (0.52 to 0.69)  | 0.00                   | <0.001         |
| 3 or 5                | 97 (0.89%)                                      | 196 (1.83%)                                                   | 0.49 (0.39 to 0.63)  | 0.02                   | <0.001         |
| 5                     | 3 (0.03%)                                       | 5 (0.06%)                                                     | 0.67 (0.11 to 4.01)  | 0.00                   | 0.661          |
| TIMI bleeding         |                                                 |                                                               |                      |                        |                |
| Major                 | 44 (0.45%)                                      | 93 (0.94%)                                                    | 0.47 (0.33 to 0.68)  | 0.28                   | <0.001         |
| Minor                 | 136 (1.44%)                                     | 241 (2.4%)                                                    | 0.56 (0.46 to 0.69)  | 0.00                   | <0.001         |
| Major or minor        | 179 (1.89%)                                     | 330 (3.33%)                                                   | 0.54 (0.45 to 0.64)  | 0.03                   | <0.001         |
| NACE                  | 382 (3.69%)                                     | 498 (4.91%)                                                   | 0.77 (0.67 to 0.88)  | 0.02                   | <0.001         |

P-values are two-sided for superiority.

BARC=Bleeding Academy Research Consortium; CI=confidence interval; HR=hazard ratio; ITT=intention to treat; MI=myocardial infarction; NACE=net adverse clinical events, defined as a composite of all-cause death, myocardial infarction, stroke, or BARC type 3 or 5 bleeding; TIMI=Thrombolysis in Myocardial Infarction.

**Supplementary table K.** One step mixed-effect Cox regression model for the ITT population excluding patients with BARC type 3 or 5 occurring during the initial DAPT phase after randomisation in GLASSY, SMART-CHOICE, STOPDAPT-2, and TICO trials

| <b>Outcome</b>        | <b>P2Y<sub>12</sub> Inhibitor<br/>(N=11560)</b> | <b>Aspirin +<br/>P2Y<sub>12</sub> Inhibitor<br/>(N=11613)</b> | <b>HR (95% CI)</b>   | <b>Tau<sup>2</sup></b> | <b>p value</b> |
|-----------------------|-------------------------------------------------|---------------------------------------------------------------|----------------------|------------------------|----------------|
| Death, MI, or stroke  | 300 (2.93%)                                     | 334 (3.34%)                                                   | 0.9 (0.77 to 1.060)  | 0.00                   | 0.203          |
| Death or MI           | 256 (2.48%)                                     | 295 (2.98%)                                                   | 0.87 (0.74 to 1.03)  | 0.00                   | 0.11           |
| Death                 |                                                 |                                                               |                      |                        |                |
| All cause             | 105 (0.97%)                                     | 134 (1.38%)                                                   | 0.80 (0.62 to 1.03)  | 0.00                   | 0.088          |
| Cardiovascular        | 60 (0.56%)                                      | 89 (0.9%)                                                     | 0.69 (0.49 to 0.95)  | 0.00                   | 0.024          |
| Non-cardiovascular    | 42 (0.38%)                                      | 42 (0.46%)                                                    | 1.03 (0.67 to 1.59)  | 0.15                   | 0.888          |
| Myocardial infarction | 166 (1.64%)                                     | 180 (1.78%)                                                   | 0.93 (0.75 to 1.14)  | 0.01                   | 0.477          |
| Stroke                |                                                 |                                                               |                      |                        |                |
| Any                   | 51 (0.51%)                                      | 45 (0.41%)                                                    | 1.10 (0.73 to 1.64)  | 0.09                   | 0.655          |
| Ischaemic             | 38 (0.39%)                                      | 36 (0.33%)                                                    | 1.01 (0.63 to 1.60)  | 0.07                   | 0.979          |
| Haemorrhagic          | 6 (0.05%)                                       | 2 (0.02%)                                                     | 2.53 (0.49 to 13.03) | 0.00                   | 0.268          |
| Stent thrombosis      |                                                 |                                                               |                      |                        |                |
| Definite              | 23 (0.24%)                                      | 26 (0.29%)                                                    | 0.85 (0.48 to 1.50)  | 0.00                   | 0.571          |
| Probable              | 6 (0.05%)                                       | 7 (0.06%)                                                     | 0.72 (0.23 to 2.26)  | 0.00                   | 0.572          |
| Possible              | 26 (0.26%)                                      | 48 (0.52%)                                                    | 0.54 (0.34 to 0.88)  | 0.00                   | 0.012          |
| Definite or probable  | 27 (0.27%)                                      | 32 (0.34%)                                                    | 0.82 (0.49 to 1.37)  | 0.00                   | 0.439          |
| Any                   | 51 (0.51%)                                      | 79 (0.85%)                                                    | 0.64 (0.45 to 0.91)  | 0.00                   | 0.012          |
| BARC bleeding         |                                                 |                                                               |                      |                        |                |
| 2, 3 or 5             | 294 (2.92%)                                     | 492 (4.77%)                                                   | 0.59 (0.51 to 0.69)  | 0.00                   | <0.001         |
| 3 or 5                | 96 (0.88%)                                      | 196 (1.83%)                                                   | 0.49 (0.38 to 0.63)  | 0.03                   | <0.001         |
| 5                     | 3 (0.03%)                                       | 5 (0.06%)                                                     | 0.67 (0.11 to 4.02)  | 0.00                   | 0.662          |
| TIMI bleeding         |                                                 |                                                               |                      |                        |                |
| Major                 | 44 (0.45%)                                      | 93 (0.94%)                                                    | 0.47 (0.33 to 0.68)  | 0.29                   | <0.001         |
| Minor                 | 135 (1.43%)                                     | 241 (2.4%)                                                    | 0.56 (0.45 to 0.69)  | 0.00                   | <0.001         |
| Major or minor        | 178 (1.88%)                                     | 330 (3.34%)                                                   | 0.53 (0.44 to 0.64)  | 0.04                   | <0.001         |
| NACE                  | 380 (3.68%)                                     | 499 (4.92%)                                                   | 0.76 (0.67 to 0.87)  | 0.02                   | <0.001         |

P-values are two-sided for superiority.

BARC=Bleeding Academy Research Consortium; CI=confidence interval; HR=hazard ratio; ITT=intention to treat; MI=myocardial infarction;

NACE=net adverse clinical events, defined as a composite of all-cause death, myocardial infarction, stroke, or BARC type 3 or 5 bleeding;

TIMI=Thrombolysis in Myocardial Infarction.

**Supplementary table L.** One step mixed-effect Cox regression model for the ITT population excluding patients with BARC type 2, 3 or 5 occurring during the initial DAPT phase after randomisation in GLASSY, SMART-CHOICE, STOPDAPT-2, and TICO trials

| <b>Outcome</b>        | <b>P2Y<sub>12</sub> Inhibitor<br/>(N=11498)</b> | <b>Aspirin +<br/>P2Y<sub>12</sub> Inhibitor<br/>(N=11544)</b> | <b>HR (95% CI)</b>   | <b>Tau<sup>2</sup></b> | <b>p value</b> |
|-----------------------|-------------------------------------------------|---------------------------------------------------------------|----------------------|------------------------|----------------|
| Death, MI, or stroke  | 295 (2.9%)                                      | 329 (3.32%)                                                   | 0.90 (0.77 to 1.06)  | 0.00                   | 0.198          |
| Death or MI           | 252 (2.46%)                                     | 290 (2.95%)                                                   | 0.87 (0.74 to 1.03)  | 0.00                   | 0.116          |
| Death                 |                                                 |                                                               |                      |                        |                |
| All cause             | 102 (0.95%)                                     | 129 (1.34%)                                                   | 0.81 (0.62 to 1.05)  | 0.00                   | 0.108          |
| Cardiovascular        | 58 (0.55%)                                      | 85 (0.86%)                                                    | 0.69 (0.50 to 0.97)  | 0.00                   | 0.032          |
| Non-cardiovascular    | 40 (0.36%)                                      | 39 (0.43%)                                                    | 1.06 (0.68 to 1.65)  | 0.24                   | 0.799          |
| Myocardial infarction | 165 (1.64%)                                     | 180 (1.8%)                                                    | 0.92 (0.75 to 1.14)  | 0.01                   | 0.444          |
| Stroke                |                                                 |                                                               |                      |                        |                |
| Any                   | 50 (0.5%)                                       | 44 (0.4%)                                                     | 1.10 (0.73 to 1.65)  | 0.09                   | 0.654          |
| Ischaemic             | 37 (0.39%)                                      | 35 (0.32%)                                                    | 1.01 (0.63 to 1.61)  | 0.07                   | 0.98           |
| Haemorrhagic          | 6 (0.05%)                                       | 2 (0.02%)                                                     | 2.52 (0.49 to 12.98) | 0.00                   | 0.27           |
| Stent thrombosis      |                                                 |                                                               |                      |                        |                |
| Definite              | 23 (0.24%)                                      | 26 (0.29%)                                                    | 0.85 (0.48 to 1.50)  | 0.00                   | 0.572          |
| Probable              | 6 (0.05%)                                       | 6 (0.05%)                                                     | 0.84 (0.26 to 2.75)  | 0.00                   | 0.771          |
| Possible              | 25 (0.25%)                                      | 45 (0.5%)                                                     | 0.56 (0.34 to 0.91)  | 0.00                   | 0.019          |
| Definite or probable  | 27 (0.28%)                                      | 31 (0.33%)                                                    | 0.84 (0.50 to 1.42)  | 0.00                   | 0.517          |
| Any                   | 50 (0.51%)                                      | 75 (0.82%)                                                    | 0.66 (0.46 to 0.94)  | 0.00                   | 0.022          |
| BARC bleeding         |                                                 |                                                               |                      |                        |                |
| 2, 3 or 5             | 286 (2.86%)                                     | 482 (4.71%)                                                   | 0.59 (0.51 to 0.68)  | 0.00                   | <0.001         |
| 3 or 5                | 93 (0.86%)                                      | 190 (1.79%)                                                   | 0.49 (0.38 to 0.63)  | 0.03                   | <0.001         |
| 5                     | 3 (0.03%)                                       | 5 (0.06%)                                                     | 0.67 (0.11 to 4.02)  | 0.00                   | 0.662          |
| TIMI bleeding         |                                                 |                                                               |                      |                        |                |
| Major                 | 42 (0.44%)                                      | 91 (0.93%)                                                    | 0.46 (0.32 to 0.67)  | 0.27                   | <0.001         |
| Minor                 | 135 (1.44%)                                     | 236 (2.37%)                                                   | 0.57 (0.46 to 0.70)  | 0.00                   | <0.001         |
| Major or minor        | 176 (1.87%)                                     | 324 (3.3%)                                                    | 0.54 (0.45 to 0.65)  | 0.06                   | <0.001         |
| NACE                  | 372 (3.62%)                                     | 490 (4.87%)                                                   | 0.76 (0.66 to 0.87)  | 0.02                   | <0.001         |

P-values are two-sided for superiority.

BARC=Bleeding Academy Research Consortium; CI=confidence interval; HR=hazard ratio; ITT=intention to treat; MI=myocardial infarction;

NACE=net adverse clinical events, defined as a composite of all-cause death, myocardial infarction, stroke, or BARC type 3 or 5 bleeding;

TIMI=Thrombolysis in Myocardial Infarction.

**Supplementary table M.** One step mixed-effect Cox regression model for ITT population excluding patients with MI, stroke, TVR, BARC type 2, 3 or 5 occurring during the initial DAPT phase after randomisation in GLASSY, SMART-CHOICE, STOPDAPT-2, and TICO trials

| <b>Outcome</b>        | <b>P2Y<sub>12</sub> Inhibitor<br/>(N=11438)</b> | <b>Aspirin +<br/>P2Y<sub>12</sub> Inhibitor<br/>(N=11474)</b> | <b>HR (95% CI)</b>  | <b>Tau<sup>2</sup></b> | <b>p value</b> |
|-----------------------|-------------------------------------------------|---------------------------------------------------------------|---------------------|------------------------|----------------|
| Death, MI, or stroke  | 293 (2.89%)                                     | 321 (3.26%)                                                   | 0.92 (0.78 to 1.07) | 0.00                   | 0.287          |
| Death or MI           | 250 (2.45%)                                     | 283 (2.9%)                                                    | 0.89 (0.75 to 1.05) | 0.00                   | 0.168          |
| Death                 |                                                 |                                                               |                     |                        |                |
| All cause             | 101 (0.94%)                                     | 125 (1.31%)                                                   | 0.83 (0.63 to 1.07) | 0.00                   | 0.152          |
| Cardiovascular        | 57 (0.54%)                                      | 82 (0.84%)                                                    | 0.71 (0.50 to 0.99) | 0.00                   | 0.045          |
| Non-cardiovascular    | 40 (0.36%)                                      | 39 (0.44%)                                                    | 1.06 (0.68 to 1.65) | 0.24                   | 0.802          |
| Myocardial infarction | 164 (1.64%)                                     | 176 (1.77%)                                                   | 0.94 (0.76 to 1.16) | 0.01                   | 0.539          |
| Stroke                |                                                 |                                                               |                     |                        |                |
| Any                   | 50 (0.5%)                                       | 43 (0.39%)                                                    | 1.12 (0.74 to 1.69) | 0.09                   | 0.582          |
| Ischaemic             | 37 (0.39%)                                      | 34 (0.31%)                                                    | 1.03 (0.65 to 1.66) | 0.07                   | 0.888          |
| Haemorrhagic          | 6 (0.05%)                                       | 2 (0.02%)                                                     | 2.52 (0.49 to 13.0) | 0.00                   | 0.269          |
| Stent thrombosis      |                                                 |                                                               |                     |                        |                |
| Definite              | 23 (0.24%)                                      | 26 (0.29%)                                                    | 0.85 (0.48 to 1.5)  | 0.00                   | 0.57           |
| Probable              | 6 (0.05%)                                       | 5 (0.04%)                                                     | 1.00 (0.29 to 3.47) | 0.00                   | 0.994          |
| Possible              | 24 (0.24%)                                      | 44 (0.49%)                                                    | 0.55 (0.33 to 0.9)  | 0.00                   | 0.018          |
| Definite or probable  | 27 (0.28%)                                      | 30 (0.32%)                                                    | 0.87 (0.51 to 1.47) | 0.00                   | 0.601          |
| Any                   | 49 (0.5%)                                       | 73 (0.81%)                                                    | 0.66 (0.46 to 0.95) | 0.00                   | 0.025          |
| BARC bleeding         |                                                 |                                                               |                     |                        |                |
| 2, 3 or 5             | 285 (2.86%)                                     | 480 (4.72%)                                                   | 0.59 (0.51 to 0.68) | 0.00                   | <0.001         |
| 3 or 5                | 93 (0.87%)                                      | 188 (1.78%)                                                   | 0.49 (0.39 to 0.63) | 0.03                   | <0.001         |
| 5                     | 3 (0.03%)                                       | 5 (0.06%)                                                     | 0.67 (0.11 to 4.01) | 0.00                   | 0.66           |
| TIMI bleeding         |                                                 |                                                               |                     |                        |                |
| Major                 | 42 (0.44%)                                      | 91 (0.94%)                                                    | 0.46 (0.32 to 0.67) | 0.27                   | <0.001         |
| Minor                 | 135 (1.44%)                                     | 235 (2.37%)                                                   | 0.57 (0.46 to 0.71) | 0.00                   | <0.001         |
| Major or minor        | 176 (1.88%)                                     | 323 (3.31%)                                                   | 0.54 (0.45 to 0.65) | 0.05                   | <0.001         |
| NACE                  | 370 (3.62%)                                     | 480 (4.8%)                                                    | 0.77 (0.67 to 0.88) | 0.02                   | <0.001         |

P-values are two-sided for superiority.

BARC=Bleeding Academy Research Consortium; CI=confidence interval; HR=hazard ratio; ITT=intention to treat; MI=myocardial infarction; NACE=net adverse clinical events, defined as a composite of all-cause death, myocardial infarction, stroke, or BARC type 3 or 5 bleeding; TIMI=Thrombolysis in Myocardial Infarction; TVR=target vessel revascularisation.

**Supplementary table N.** One step mixed-effect Cox regression model in the on-treatment populations

| Outcome               | Intention to treat population               |                                                          |                         |                  |         | Per-protocol population                    |                                                         |                        |                  |         |
|-----------------------|---------------------------------------------|----------------------------------------------------------|-------------------------|------------------|---------|--------------------------------------------|---------------------------------------------------------|------------------------|------------------|---------|
|                       | P2Y <sub>12</sub><br>Inhibitor<br>(N=10135) | Aspirin +<br>P2Y <sub>12</sub><br>Inhibitor<br>(N=10169) | HR (95% CI)             | Tau <sup>2</sup> | p value | P2Y <sub>12</sub><br>Inhibitor<br>(N=9455) | Aspirin +<br>P2Y <sub>12</sub><br>Inhibitor<br>(N=9898) | HR (95% CI)            | Tau <sup>2</sup> | p value |
| Death, MI, or stroke  | 254 (2.91%)                                 | 248 (2.98%)                                              | 1.01<br>(0.85 to 1.2)   | 0.00             | 0.919   | 239 (2.89%)                                | 239 (2.92%)                                             | 1.02<br>(0.85 to 1.22) | 0.00             | 0.859   |
| Death or MI           | 215 (2.46%)                                 | 222 (2.68%)                                              | 0.95<br>(0.79 to 1.15)  | 0.00             | 0.608   | 205 (2.47%)                                | 218 (2.68%)                                             | 0.95<br>(0.79 to 1.15) | 0.00             | 0.62    |
| Death                 |                                             |                                                          |                         |                  |         |                                            |                                                         |                        |                  |         |
| All cause             | 77 (0.82%)                                  | 88 (1.08%)                                               | 0.88<br>(0.65 to 1.2)   | 0.05             | 0.433   | 77 (0.87%)                                 | 84 (1.05%)                                              | 0.97<br>(0.71 to 1.32) | 0.13             | 0.842   |
| Cardiovascular        | 49 (0.53%)                                  | 66 (0.82%)                                               | 0.74<br>(0.51 to 1.07)  | 0.00             | 0.114   | 49 (0.56%)                                 | 62 (0.78%)                                              | 0.82<br>(0.56 to 1.20) | 0.00             | 0.308   |
| Non-cardiovascular    | 28 (0.29%)                                  | 22 (0.26%)                                               | 1.33<br>(0.75 to 2.34)  | 0.46             | 0.324   | 28 (0.31%)                                 | 22 (0.26%)                                              | 1.40<br>(0.79 to 2.47) | 0.52             | 0.245   |
| Myocardial infarction | 150 (1.75%)                                 | 144 (1.71%)                                              | 1.02<br>(0.81 to 1.28)  | 0.00             | 0.86    | 140 (1.73%)                                | 143 (1.73%)                                             | 0.98<br>(0.78 to 1.24) | 0.00             | 0.878   |
| Stroke                |                                             |                                                          |                         |                  |         |                                            |                                                         |                        |                  |         |
| Any                   | 44 (0.5%)                                   | 29 (0.32%)                                               | 1.44<br>(0.89 to 2.3)   | 0.00             | 0.135   | 39 (0.47%)                                 | 24 (0.27%)                                              | 1.59<br>(0.95 to 2.66) | 0.00             | 0.077   |
| Ischaemic             | 35 (0.41%)                                  | 25 (0.28%)                                               | 1.31<br>(0.78 to 2.20)  | 0.00             | 0.314   | 32 (0.4%)                                  | 20 (0.23%)                                              | 1.41<br>(0.79 to 2.50) | 0.00             | 0.24    |
| Haemorrhagic          | 5 (0.05%)                                   | 2 (0.02%)                                                | 1.98<br>(0.36 to 10.81) | 0.00             | 0.431   | 4 (0.04%)                                  | 2 (0.02%)                                               | 1.66<br>(0.28 to 9.96) | 0.00             | 0.58    |
| Stent thrombosis      |                                             |                                                          |                         |                  |         |                                            |                                                         |                        |                  |         |
| Definite              | 20 (0.25%)                                  | 20 (0.28%)                                               | 0.97<br>(0.52 to 1.80)  | 0.00             | 0.92    | 16 (0.21%)                                 | 20 (0.28%)                                              | 0.82<br>(0.42 to 1.59) | 0.00             | 0.552   |
| Probable              | 5 (0.05%)                                   | 5 (0.05%)                                                | 0.60<br>(0.14 to 2.52)  | 0.77             | 0.488   | -                                          | -                                                       | -                      | -                | -       |
| Possible              | 22 (0.24%)                                  | 40 (0.53%)                                               | 0.54<br>(0.32 to 0.91)  | 0.00             | 0.02    | 22 (0.25%)                                 | 40 (0.54%)                                              | 0.55<br>(0.32 to 0.92) | 0.00             | 0.023   |
| Definite or probable  | 23 (0.28%)                                  | 24 (0.32%)                                               | 0.89<br>(0.50 to 1.59)  | 0.00             | 0.704   | 19 (0.25%)                                 | 24 (0.32%)                                              | 0.77<br>(0.41 to 1.43) | 0.00             | 0.404   |
| Any                   | 45 (0.52%)                                  | 64 (0.85%)                                               | 0.67<br>(0.46 to 0.99)  | 0.00             | 0.042   | 41 (0.5%)                                  | 64 (0.86%)                                              | 0.62<br>(0.42 to 0.92) | 0.00             | 0.017   |



|                |             |             |                        |      |        |             |             |                        |      |        |
|----------------|-------------|-------------|------------------------|------|--------|-------------|-------------|------------------------|------|--------|
| BARC bleeding  |             |             |                        |      |        |             |             |                        |      |        |
| 2, 3 or 5      | 262 (3.05%) | 430 (4.97%) | 0.60<br>(0.51 to 0.69) | 0.00 | <0.001 | 249 (3.05%) | 416 (4.9%)  | 0.61<br>(0.52 to 0.71) | 0.00 | <0.001 |
| 3 or 5         | 74 (0.8%)   | 126 (1.44%) | 0.58<br>(0.43 to 0.77) | 0.00 | <0.001 | 71 (0.81%)  | 117 (1.37%) | 0.62<br>(0.46 to 0.84) | 0.02 | 0.002  |
| 5              | -           | -           | -                      | -    | -      | -           | -           | -                      | -    | -      |
| TIMI bleeding  |             |             |                        |      |        |             |             |                        |      |        |
| Major          | 35 (0.41%)  | 59 (0.79%)  | 0.58<br>(0.38 to 0.89) | 0.00 | 0.012  | 35 (0.43%)  | 54 (0.75%)  | 0.65<br>(0.42 to 0.99) | 0.02 | 0.045  |
| Minor          | 111 (1.39%) | 185 (2.21%) | 0.58<br>(0.46 to 0.73) | 0.00 | <0.001 | 110 (1.44%) | 179 (2.18%) | 0.59<br>(0.46 to 0.75) | 0.03 | <0.001 |
| Major or minor | 146 (1.8%)  | 242 (2.99%) | 0.58<br>(0.47 to 0.71) | 0.04 | <0.001 | 145 (1.88%) | 232 (2.93%) | 0.60<br>(0.49 to 0.74) | 0.10 | <0.001 |
| NACE           | 316 (3.59%) | 360 (4.27%) | 0.86<br>(0.74 to 1.01) | 0.00 | 0.06   | 299 (3.59%) | 342 (4.14%) | 0.89<br>(0.76 to 1.04) | 0.00 | 0.142  |

P-values are two-sided for superiority.

BARC=Bleeding Academy Research Consortium; CI=confidence interval; HR=hazard ratio; MI=myocardial infarction; NACE=net adverse clinical events, defined as a composite of all-cause death, myocardial infarction, stroke, or BARC type 3 or 5 bleeding;

TIMI=Thrombolysis in Myocardial Infarction.

**Supplementary table O.** One step mixed-effect Cox regression model for ITT population right censoring events 9 months after the start of P2Y<sub>12</sub> inhibitor monotherapy in the experimental groups

| <b>Outcome</b>        | <b>P2Y<sub>12</sub> Inhibitor<br/>(N=11634)</b> | <b>Aspirin +<br/>P2Y<sub>12</sub> Inhibitor<br/>(N=11674)</b> | <b>HR (95% CI)</b>  | <b>Tau<sup>2</sup></b> | <b>p value</b> |
|-----------------------|-------------------------------------------------|---------------------------------------------------------------|---------------------|------------------------|----------------|
| Death, MI, or stroke  | 259 (2.28%)                                     | 284 (2.49%)                                                   | 0.92 (0.77 to 1.08) | 0.00                   | 0.312          |
| Death or MI           | 221 (1.94%)                                     | 249 (2.18%)                                                   | 0.89 (0.74 to 1.07) | 0.00                   | 0.213          |
| Death                 |                                                 |                                                               |                     |                        |                |
| All cause             | 98 (0.86%)                                      | 111 (0.97%)                                                   | 0.90 (0.69 to 1.19) | 0.00                   | 0.466          |
| Cardiovascular        | 55 (0.48%)                                      | 75 (0.65%)                                                    | 0.75 (0.53 to 1.06) | 0.00                   | 0.101          |
| Non-cardiovascular    | 39 (0.34%)                                      | 31 (0.27%)                                                    | 1.31 (0.81 to 2.10) | 0.01                   | 0.27           |
| Myocardial infarction | 137 (1.2%)                                      | 153 (1.34%)                                                   | 0.90 (0.71 to 1.13) | 0.01                   | 0.364          |
| Stroke                |                                                 |                                                               |                     |                        |                |
| Any                   | 43 (0.37%)                                      | 41 (0.36%)                                                    | 1.01 (0.65 to 1.55) | 0.00                   | 0.978          |
| Ischaemic             | 30 (0.26%)                                      | 32 (0.28%)                                                    | 0.88 (0.53 to 1.46) | 0.00                   | 0.621          |
| Haemorrhagic          | 6 (0.05%)                                       | 2 (0.02%)                                                     | 2.52 (0.49 to 13.0) | 0.00                   | 0.269          |
| Stent thrombosis      |                                                 |                                                               |                     |                        |                |
| Definite              | 17 (0.15%)                                      | 19 (0.17%)                                                    | 0.84 (0.43 to 1.64) | 0.00                   | 0.618          |
| Probable              | 6 (0.05%)                                       | 7 (0.06%)                                                     | 0.72 (0.23 to 2.26) | 0.00                   | 0.571          |
| Possible              | 24 (0.21%)                                      | 38 (0.33%)                                                    | 0.63 (0.38 to 1.06) | 0.00                   | 0.08           |
| Definite or probable  | 21 (0.18%)                                      | 25 (0.22%)                                                    | 0.80 (0.45 to 1.44) | 0.00                   | 0.463          |
| Any                   | 43 (0.38%)                                      | 62 (0.54%)                                                    | 0.68 (0.46 to 1.01) | 0.00                   | 0.053          |
| BARC bleeding         |                                                 |                                                               |                     |                        |                |
| 2, 3 or 5             | 242 (2.13%)                                     | 432 (3.83%)                                                   | 0.56 (0.48 to 0.65) | 0.03                   | <0.001         |
| 3 or 5                | 85 (0.75%)                                      | 180 (1.58%)                                                   | 0.47 (0.36 to 0.61) | 0.02                   | <0.001         |
| 5                     | 3 (0.03%)                                       | 5 (0.06%)                                                     | 0.67 (0.11 to 4.02) | 0.00                   | 0.662          |
| TIMI bleeding         |                                                 |                                                               |                     |                        |                |
| Major                 | 34 (0.3%)                                       | 81 (0.71%)                                                    | 0.42 (0.28 to 0.63) | 0.34                   | <0.001         |
| Minor                 | 103 (0.9%)                                      | 211 (1.85%)                                                   | 0.48 (0.38 to 0.61) | 0.00                   | <0.001         |
| Major or minor        | 137 (1.2%)                                      | 288 (2.53%)                                                   | 0.47 (0.38 to 0.58) | 0.02                   | <0.001         |
| NACE                  | 332 (2.93%)                                     | 441 (3.89%)                                                   | 0.75 (0.65 to 0.87) | 0.02                   | <0.001         |

P-values are two-sided for superiority.

BARC=Bleeding Academy Research Consortium; CI=confidence interval; HR=hazard ratio; ITT=intention to treat; MI=myocardial infarction; NACE=net adverse clinical events, defined as a composite of all-cause death, myocardial infarction, stroke, or BARC type 3 or 5 bleeding; TIMI=Thrombolysis in Myocardial Infarction.

## Supplementary figures

Supplementary figure A. PRISMA Flow Diagram for the Systematic Review

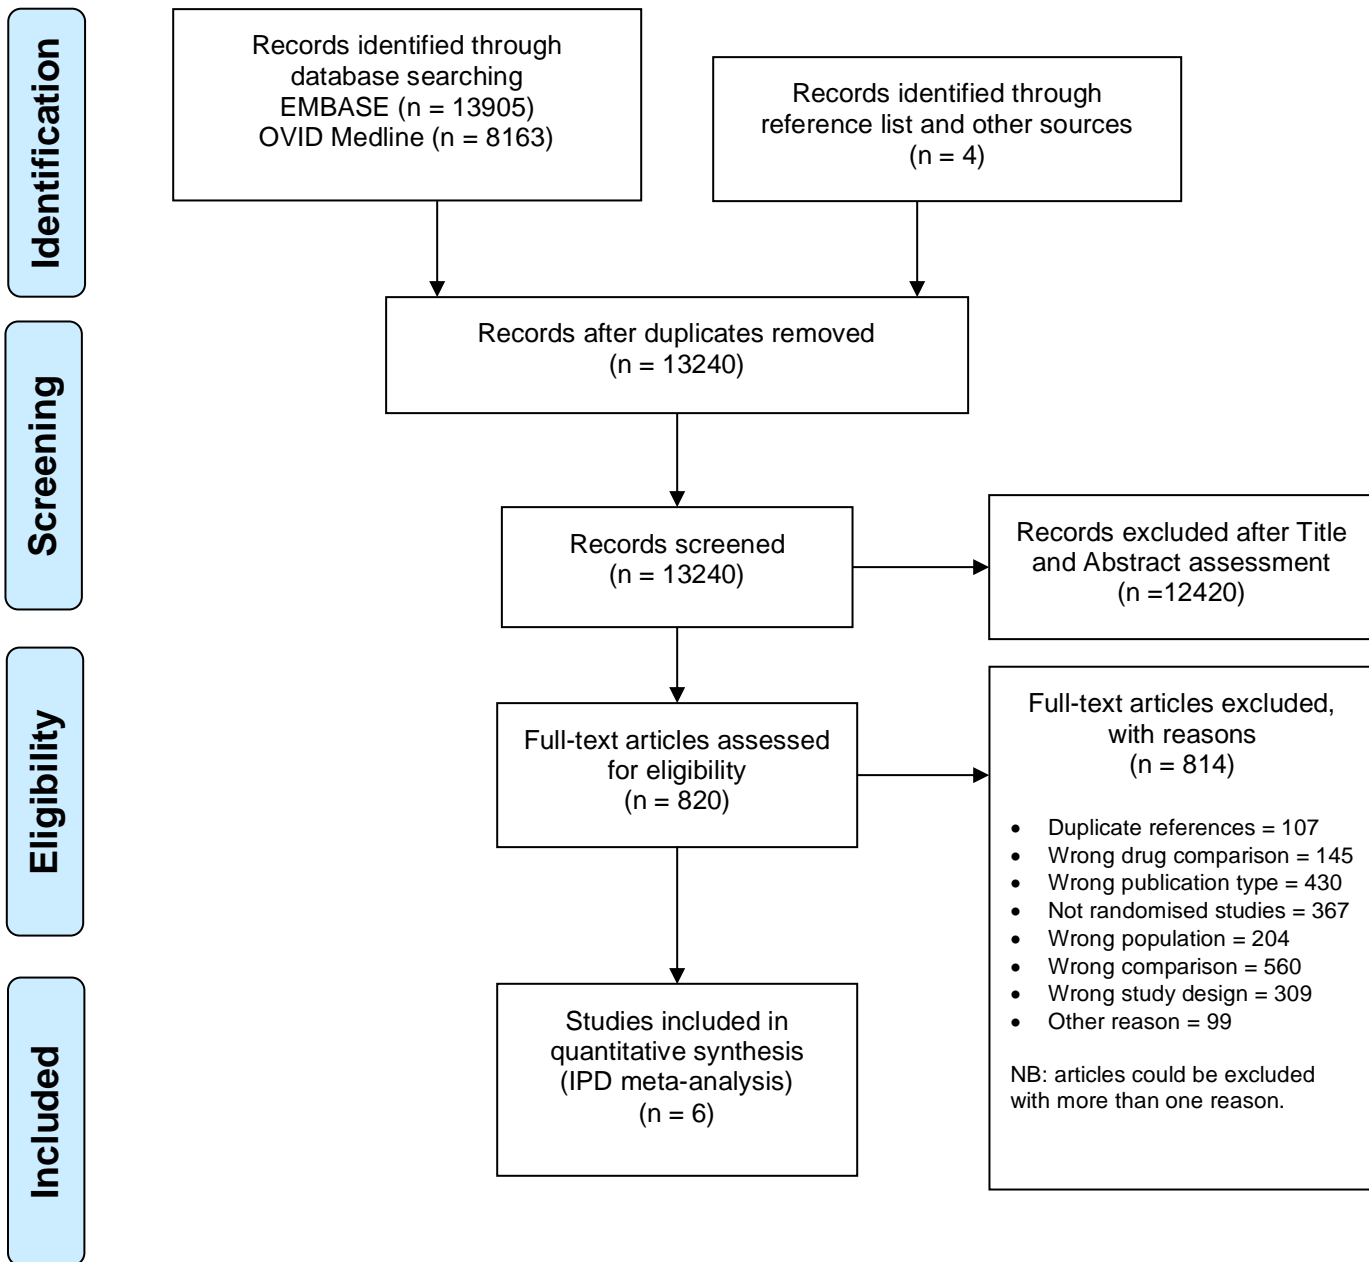

## Supplementary figure B. SIDNEY-2 flow-chart

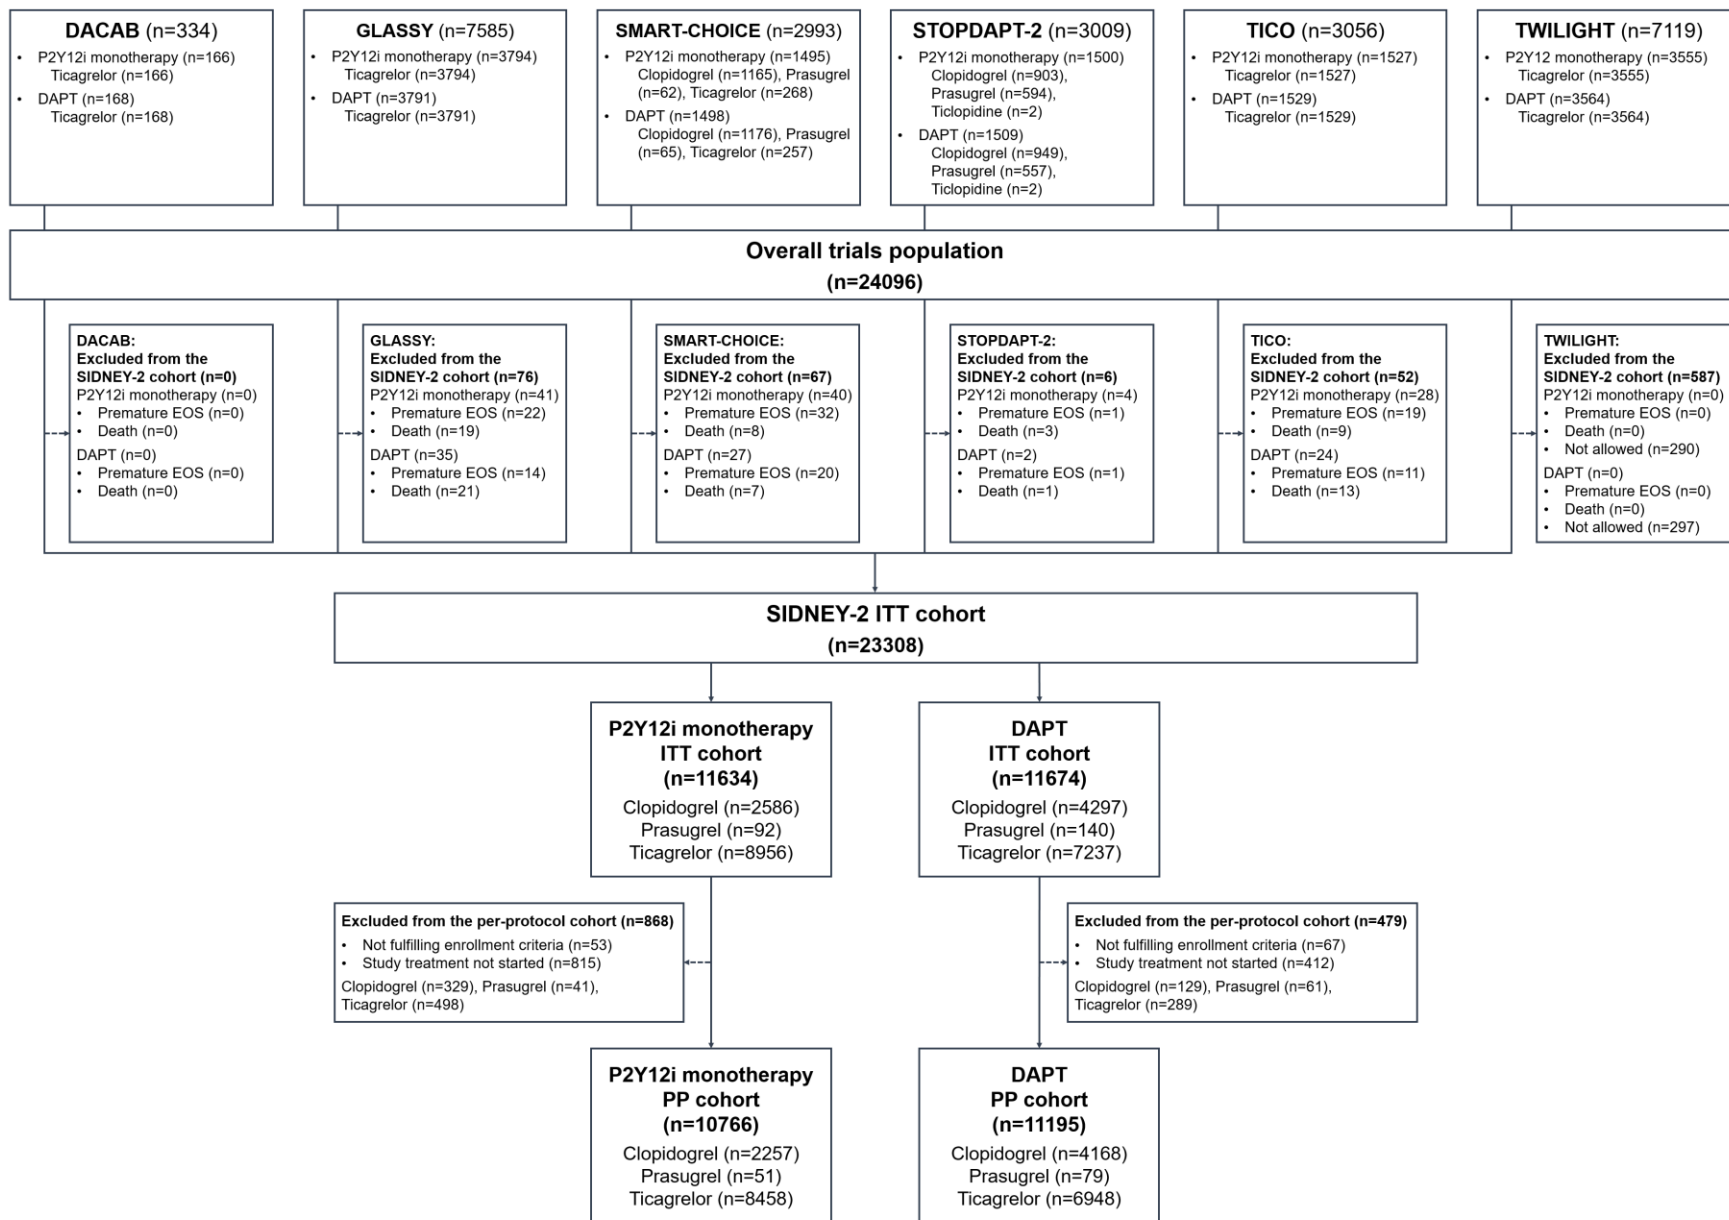

DACAB=Different Antiplatelet Therapy Strategy After Coronary Artery Bypass Graft Surgery; DAPT=dual antiplatelet therapy; EOS=end of study; GLASSY=GLOBAL LEADERS Adjudication Sub-Study; ITT=intention to treat; PP=per-protocol; SMART-CHOICE=Smart Angioplasty Research Team: Comparison Between P2Y12 Antagonist Monotherapy vs Dual Antiplatelet Therapy in Patients Undergoing Implantation of Coronary Drug-Eluting Stents; STOPDAPT-2=Short and Optimal Duration of Dual Antiplatelet Therapy After Everolimus-Eluting Cobalt-Chromium Stent; TICO=Ticagrelor Monotherapy After 3 Months in the Patients Treated With New Generation Sirolimus-eluting Stent for Acute Coronary Syndrome; TWILIGHT=Ticagrelor with Aspirin or Alone in High-Risk Patients after Coronary Intervention.

**Supplementary figure C.** Subgroup analyses for the primary endpoint of all-cause death, myocardial infarction, or stroke in the per-protocol population

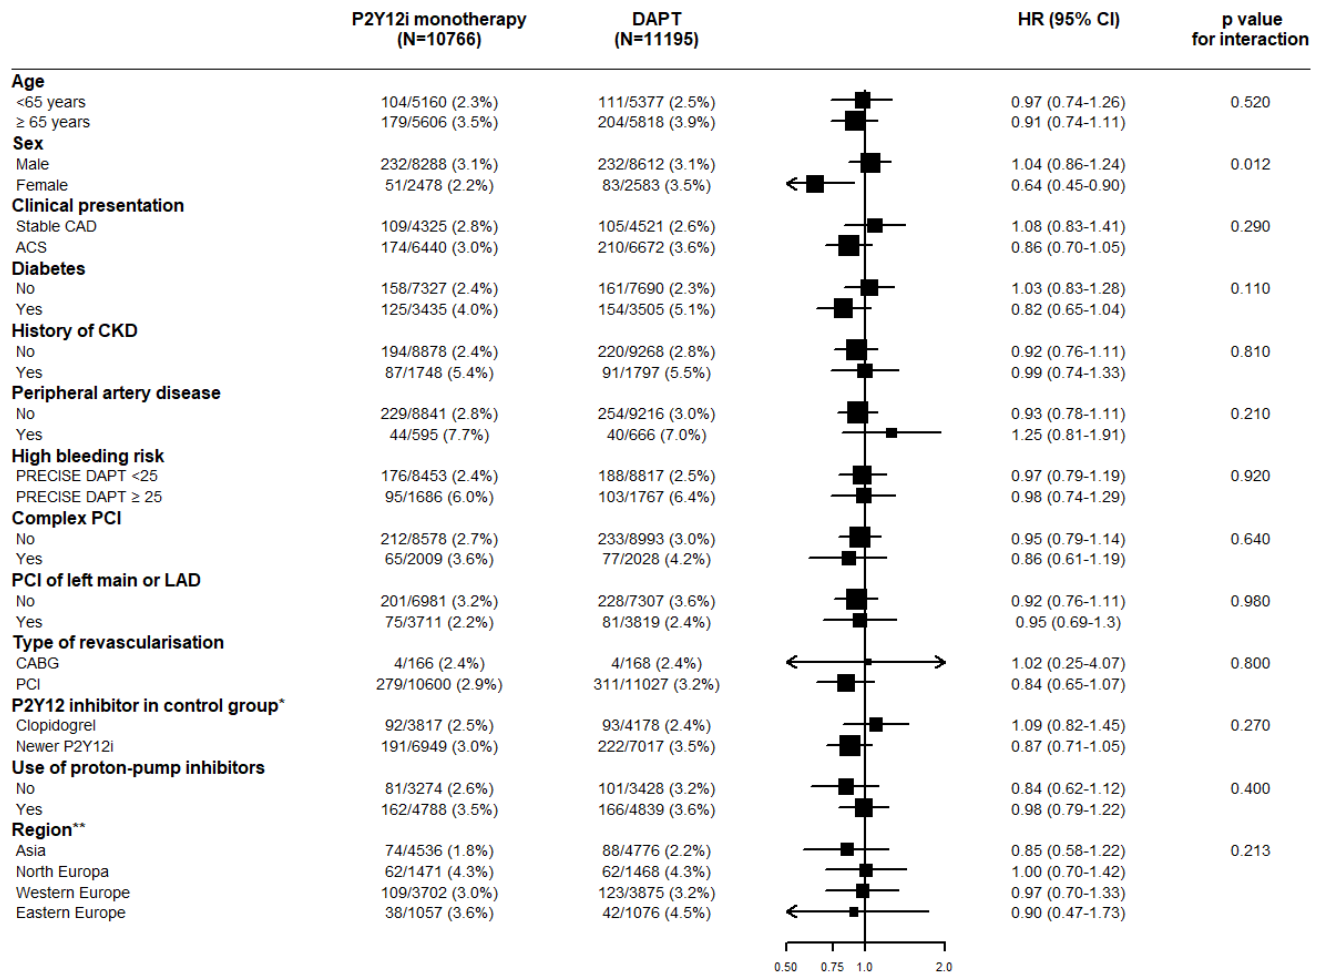

**Supplementary figure D.** Subgroup analyses for the primary endpoint of all-cause death, myocardial infarction, or stroke for monotherapy with a newer P2Y<sub>12</sub> inhibitor in the experimental arm in the intention to treat population

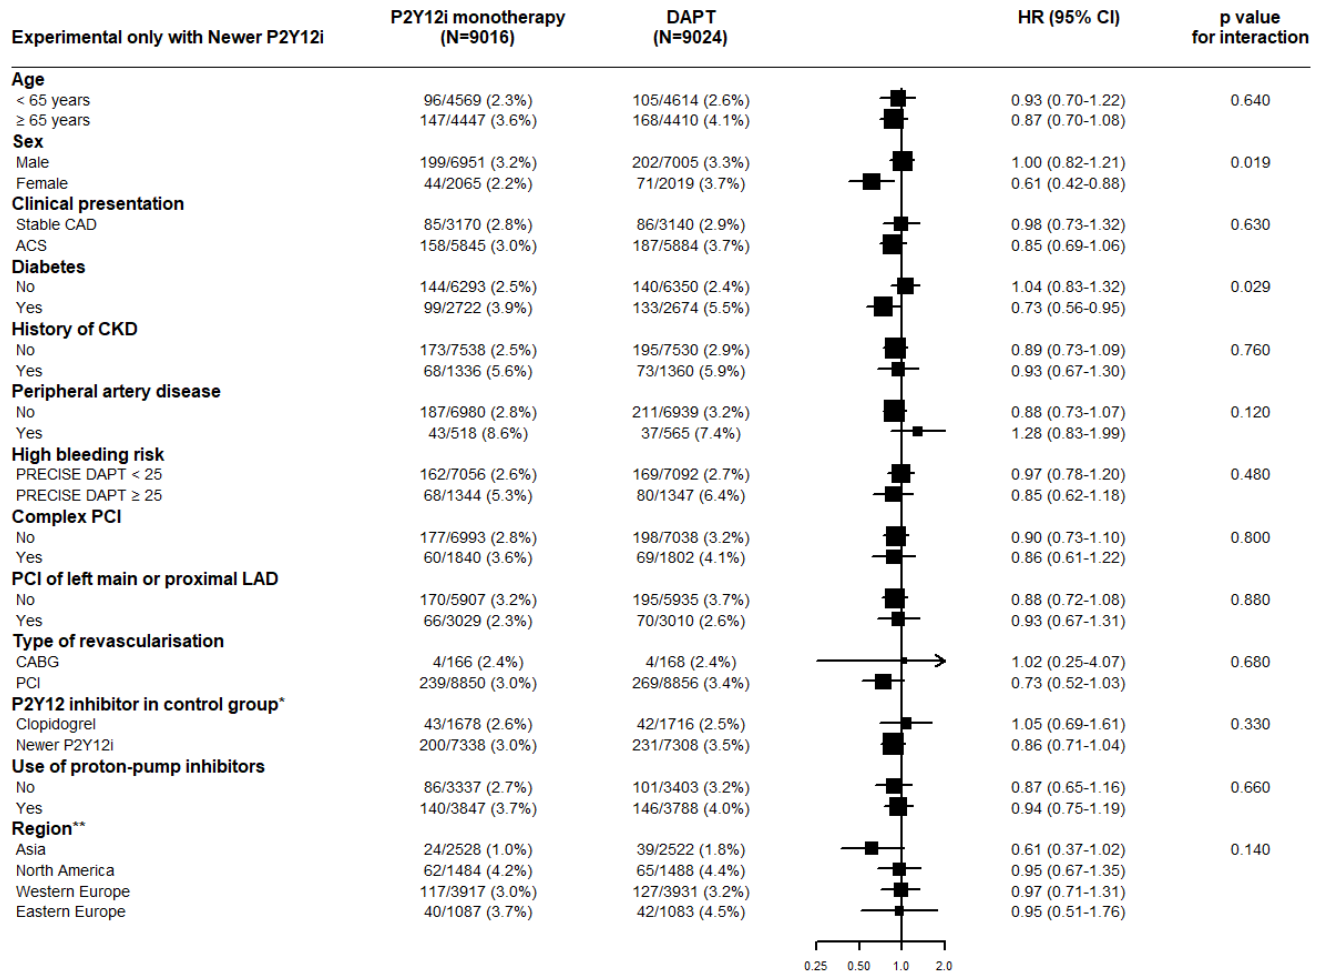

**Supplementary figure E.** Subgroup analyses for the primary endpoint of all-cause death, myocardial infarction, or stroke for monotherapy with clopidogrel in the experimental arm in the intention to treat population

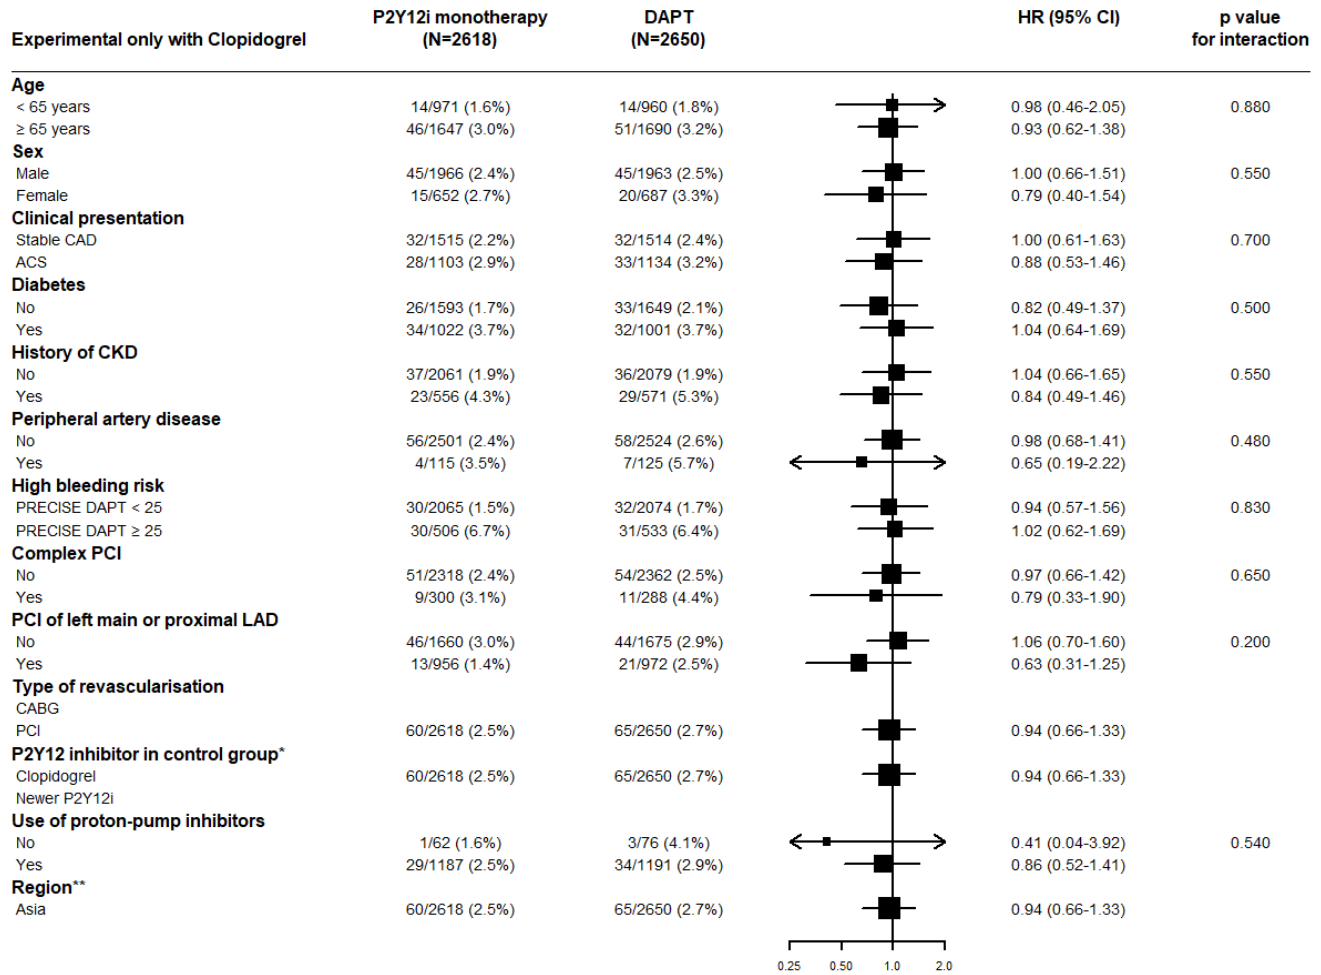



**Supplementary figure F.** Subgroup analyses for the key safety endpoint of Bleeding Academic Research Consortium (BARC) type 3 or 5 bleeding in the intention to treat population

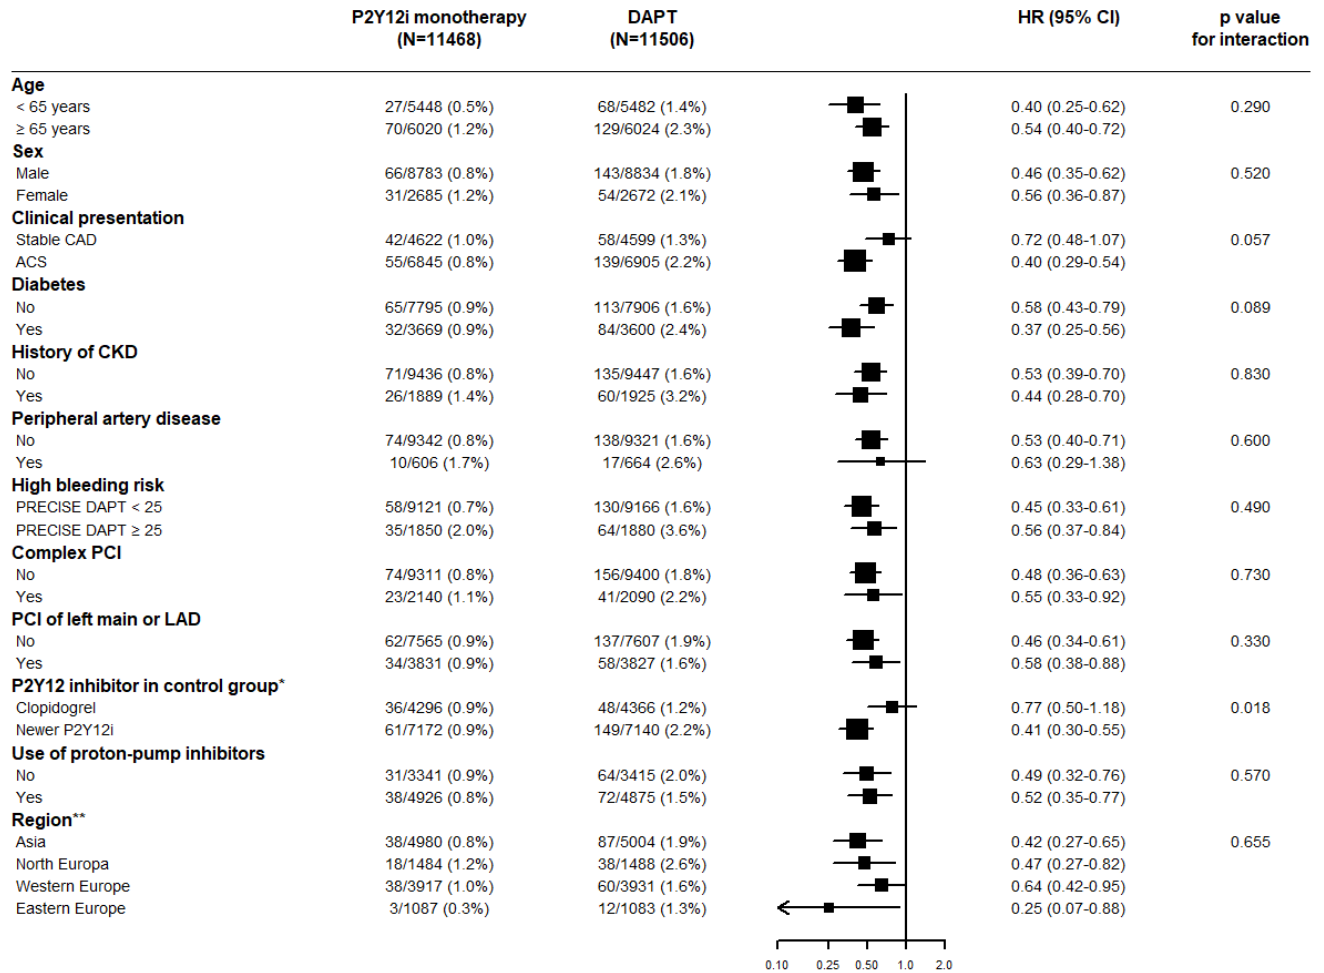

**Supplementary figure G.** Subgroup analyses for the key safety endpoint of Bleeding Academic Research Consortium (BARC) type 3 or 5 bleeding for monotherapy with a newer P2Y<sub>12</sub> inhibitor in the experimental arm in the intention to treat population

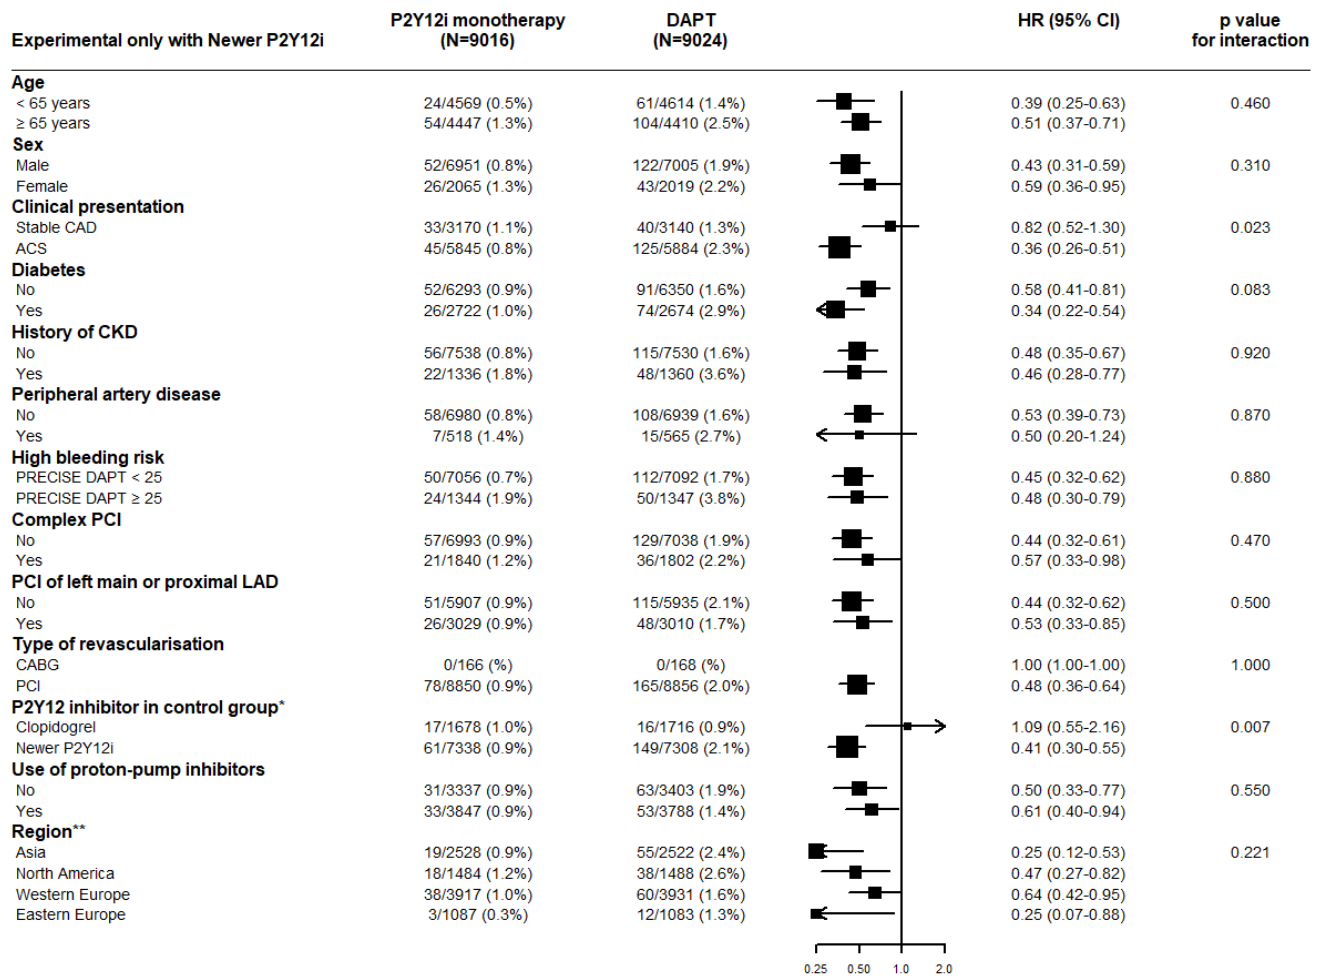

**Supplementary figure H.** Subgroup analyses for the key safety endpoint of Bleeding Academic Research Consortium (BARC) type 3 or 5 bleeding for monotherapy with clopidogrel in the experimental arm in the intention to treat population

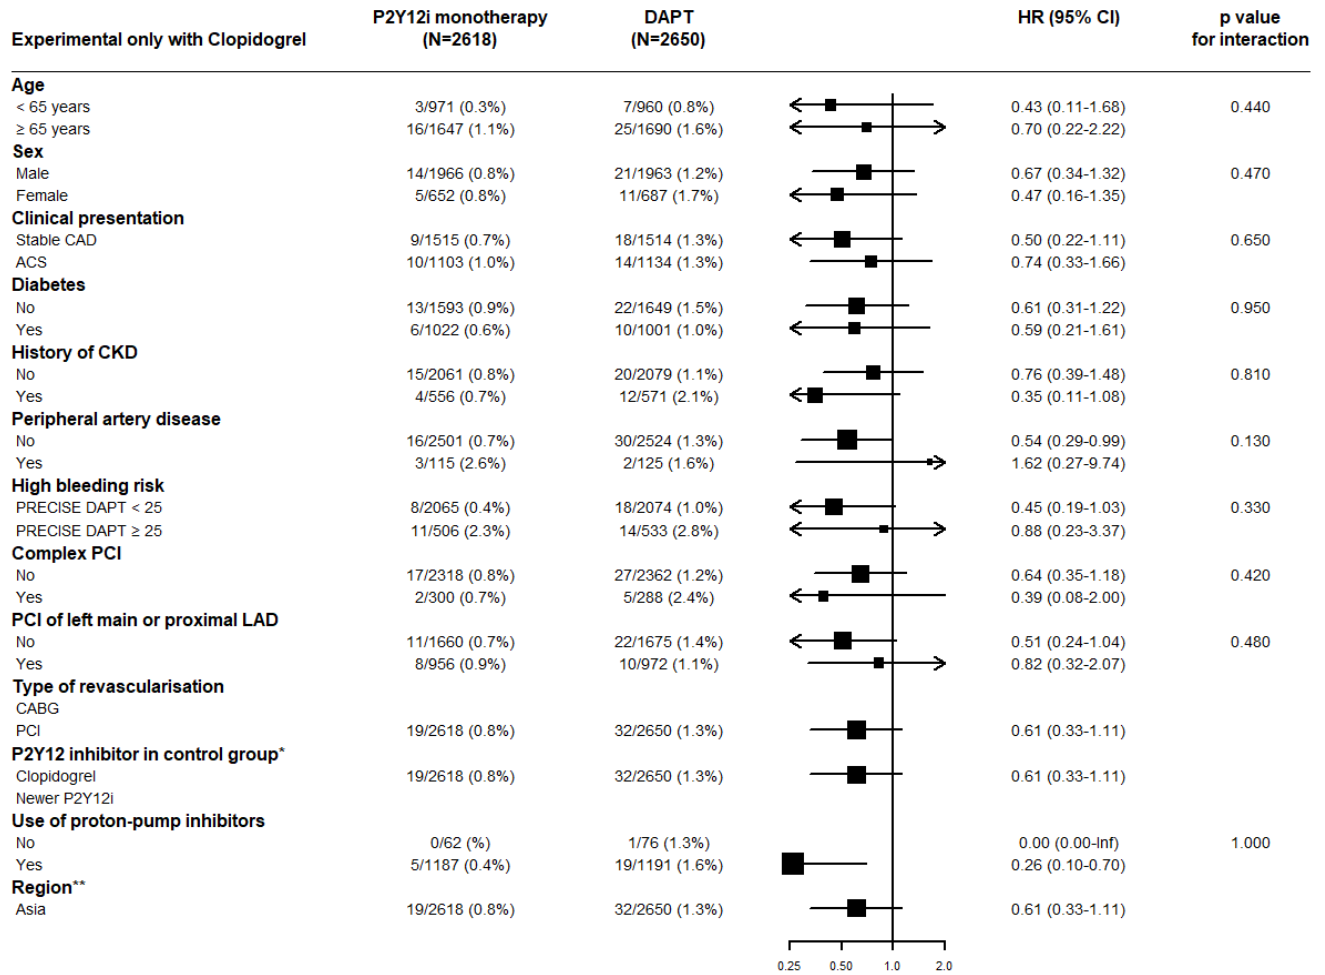

**Supplementary figure I.** Treatment-by-weight interaction for the primary efficacy endpoint of all-cause death, cardiovascular death, myocardial infarction, or stroke stratified by sex in the intention to treat population

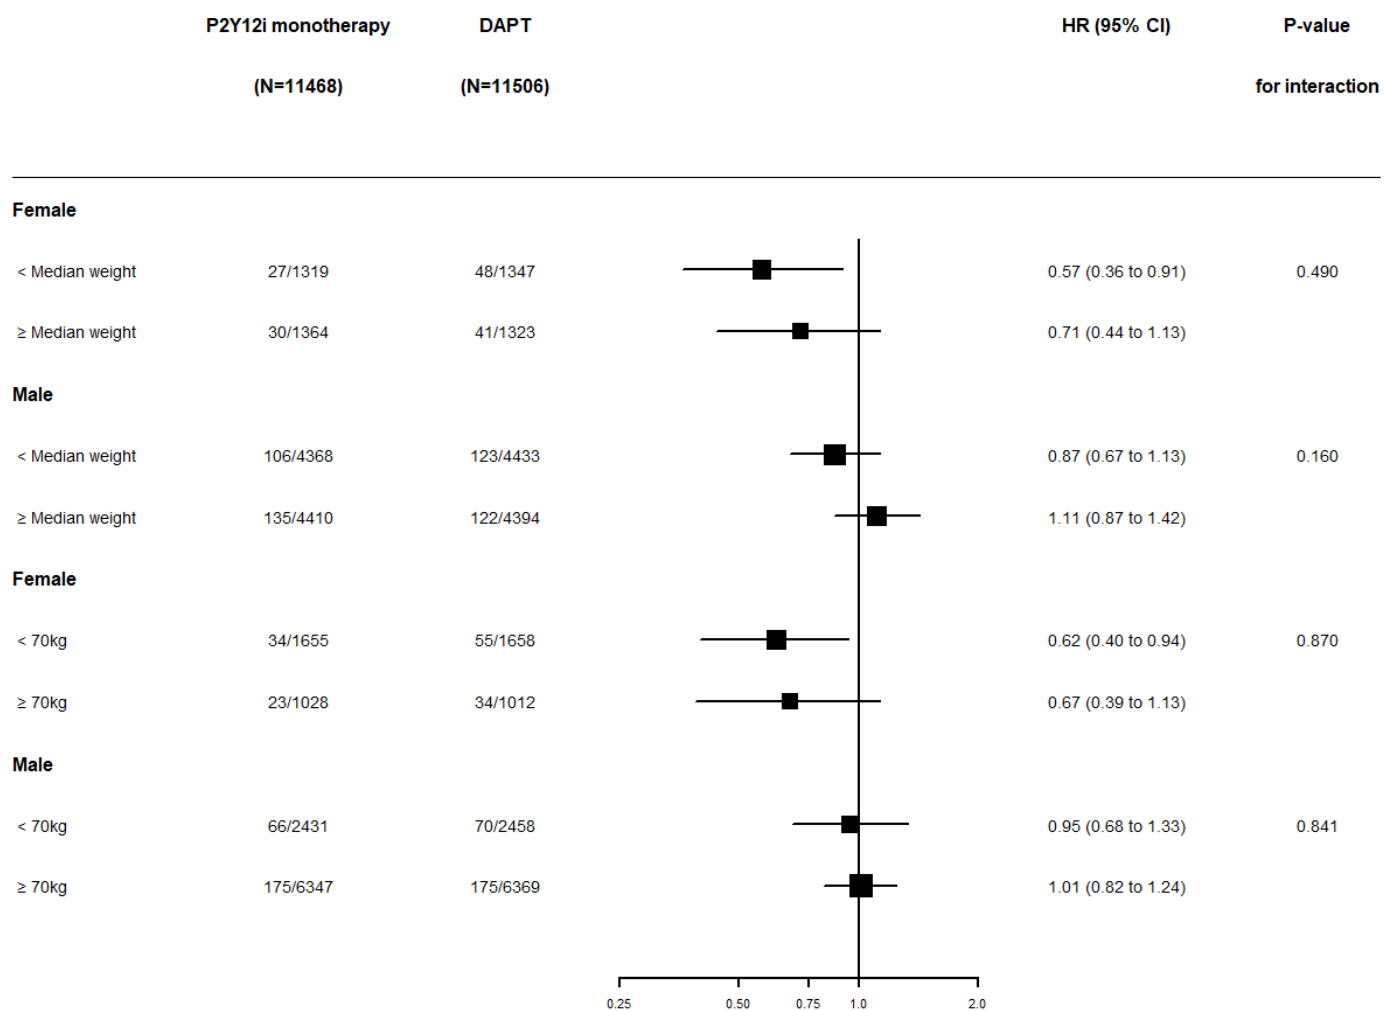

**Supplementary figure J. Treatment-by-sex interaction testing for the primary outcome for each trial**

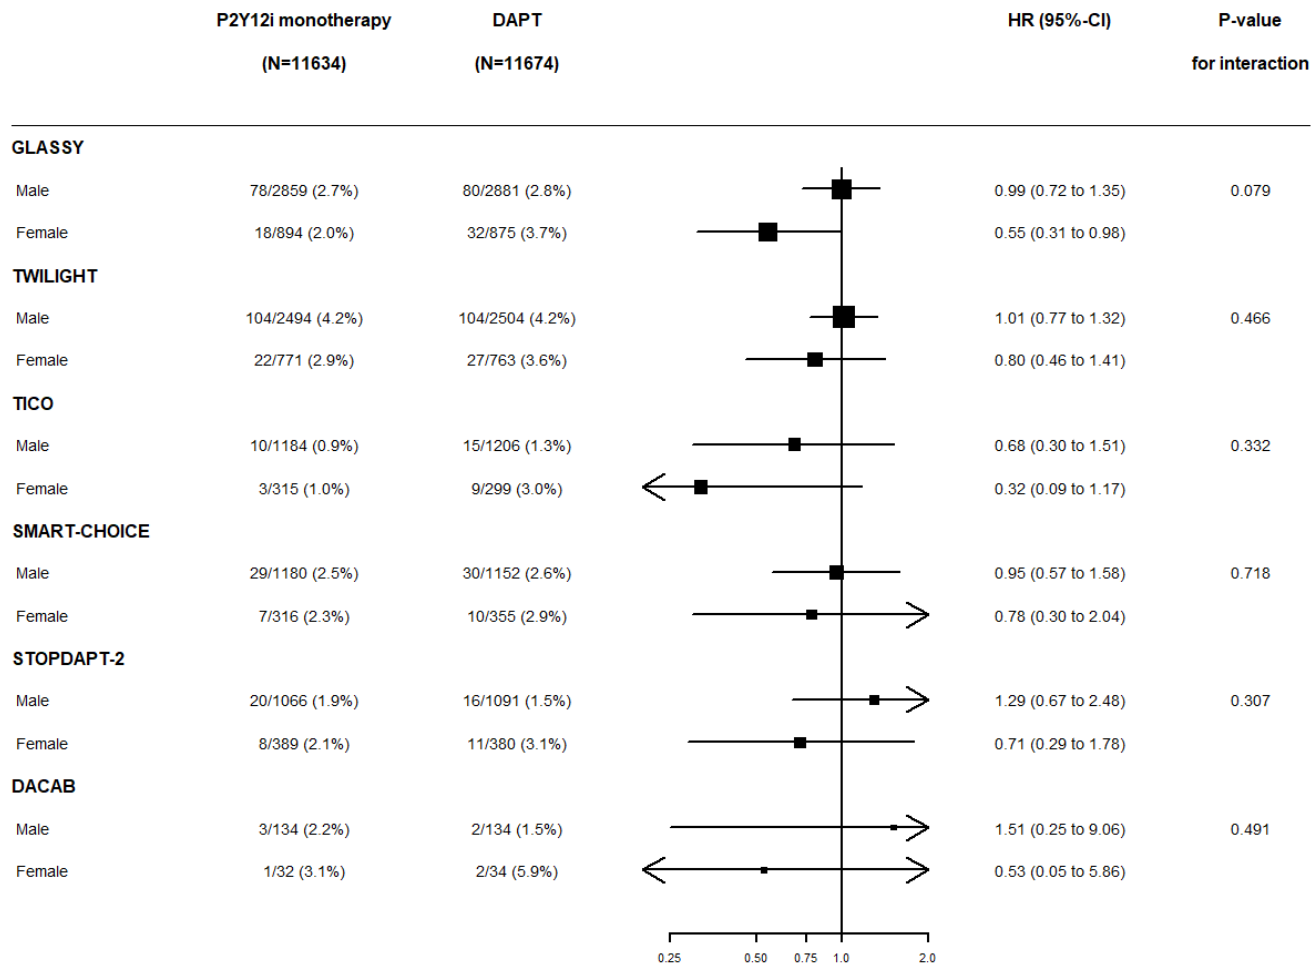

## Supplementary references

- 1 Zhao Q, Zhu Y, Xu Z, et al. Effect of Ticagrelor Plus Aspirin, Ticagrelor Alone, or Aspirin Alone on Saphenous Vein Graft Patency 1 Year After Coronary Artery Bypass Grafting. *JAMA*. 2018;319:1677. doi:10.1001/jama.2018.3197
- 2 Franzone A, Mc Fadden E, Leonardi S, et al. Ticagrelor Alone Versus Dual Antiplatelet Therapy From 1 Month After Drug-Eluting Coronary Stenting. *J Am Coll Cardiol*. 2019;74:2223-2234. doi:10.1016/j.jacc.2019.08.1038
- 3 Hahn JY, Song Y Bin, Oh JH, et al. Effect of P2Y12 Inhibitor Monotherapy vs Dual Antiplatelet Therapy on Cardiovascular Events in Patients Undergoing Percutaneous Coronary Intervention. *JAMA*. 2019;321:2428. doi:10.1001/jama.2019.8146
- 4 Watanabe H, Domei T, Morimoto T, et al. Effect of 1-Month Dual Antiplatelet Therapy Followed by Clopidogrel vs 12-Month Dual Antiplatelet Therapy on Cardiovascular and Bleeding Events in Patients Receiving PCI. *JAMA*. 2019;321:2414. doi:10.1001/jama.2019.8145
- 5 Kim BK, Hong SJ, Cho YH, et al. Effect of Ticagrelor Monotherapy vs Ticagrelor With Aspirin on Major Bleeding and Cardiovascular Events in Patients With Acute Coronary Syndrome: The TICO Randomized Clinical Trial. *JAMA*. 2020;323:2407–16. doi: 10.1001/jama.2020.7580
- 6 Mehran R, Baber U, Sharma SK, et al. Ticagrelor with or without Aspirin in High-Risk Patients after PCI. *N Engl J Med*. 2019;381:2032-2042. doi:10.1056/NEJMoa1908419
- 7 Vranckx P, Valgimigli M, Jüni P, et al. Ticagrelor plus aspirin for 1 month, followed by ticagrelor monotherapy for 23 months vs aspirin plus clopidogrel or ticagrelor for 12 months, followed by aspirin monotherapy for 12 months after implantation of a drug-eluting stent: a multicentre, open-la. *Lancet*. 2018; 392:940–49. doi: 10.1016/S0140-6736(18)31858-0
- 8 Hernán MA, Clayton D, Keiding N. The Simpson's paradox unraveled. *Int J Epidemiol*. 2011;40:780–5. doi: 10.1093/ije/dyr041
- 9 Smeeth L, Haines A, Ebrahim S. Numbers needed to treat derived from meta-analyses–

sometimes informative, usually misleading. *BMJ*. 1999;318:1548–51. doi:  
10.1136/bmj.318.7197.1548
